# Supplementary material for: Environmental Applications of Zeolites: Preparation and Screening of Cu-Modified Zeolites as Potential CO Sensors
Source: MDPI journal article supplement (doi:10.3390/chemistry5010024), 2023-02-20
Supplement: s1 [file s1]

Archive with 1 entries (1 files):
- chemistry-2204676-supplementary.pdf
