# Supplementary material for: Environmental Applications of Zeolites: Preparation and Screening of Cu-Modified Zeolites as Potential CO Sensors
Source: MDPI journal article supplement (doi:10.3390/chemistry5010024), 2023-02-20
Supplement: s1 [file s1 › chemistry-2204676-supplementary.pdf]

# Environmental Applications of Zeolites: Preparation and Screening of Cu-Modified Zeolites as Potential CO Sensors

Martin Jendrlin <sup>1,\*</sup>, Julien Grand <sup>2</sup>, Louwanda Lakiss <sup>2</sup>, Philippe Bazin <sup>2</sup>, Svetlana Mintova <sup>2</sup> and Vladimir Zholobenko <sup>1</sup>

<sup>1</sup> School of Chemical and Physical Sciences, Keele University, Keele ST5 5BG, UK; v.l.zholobenko@keele.ac.uk

<sup>2</sup> Laboratoire Catalyse et Spectrochimie, ENSICAEN, CNRS, Normandie Université, 6 Bd Maréchal Juin, 14000 Caen, France; jgrand1985@gmail.com (J.G.); louwanda.lakiss@ensicaen.fr (L.L.); philippe.bazin@ensicaen.fr (P.B.); svetlana.mintova@ensicaen.fr (S.M.)

\* Correspondence: m.jendrlin@keele.ac.uk

## Supplementary information: CU CO SI

Table S1 Zeolite properties of the zeolites used in this work, Si/Al values were determined by the manufacturers, MR – membered ring

|               | Structure type        | Si/Al | Pore Size, Å | Largest Channel, MR | Channel Network | Crystallite size, $\mu\text{m}$ | Extraframework Cation |
|---------------|-----------------------|-------|--------------|---------------------|-----------------|---------------------------------|-----------------------|
| <b>MOR</b>    | MOR (Mordenite)       | 10.0  | 6.7          | 12                  | 1D              | 0.74                            | $\text{NH}_4^+$       |
| <b>BEA-12</b> | BEA (Zeolite Beta)    | 12.5  | 6.8          | 12                  | 3D              | 0.04                            | $\text{NH}_4^+$       |
| <b>BEA-19</b> | BEA (Zeolite Beta)    | 19.0  | 6.8          | 12                  | 3D              | 0.04                            | $\text{NH}_4^+$       |
| <b>ZSM-5</b>  | MFI (Mobil Type Five) | 40.0  | 5.5          | 10                  | 2D              | 0.52                            | $\text{NH}_4^+$       |
| <b>NaX</b>    | FAU (Faujasite)       | 1.3   | 7.4          | 12                  | 3D              | 0.78                            | $\text{Na}^+$         |
| <b>NaY</b>    | FAU (Faujasite)       | 2.6   | 7.4          | 12                  | 3D              | 0.78                            | $\text{Na}^+$         |
| <b>FER</b>    | FER (Ferrierite)      | 10.0  | 5.0          | 10                  | 2D              | 0.6                             | $\text{Na}^+$         |

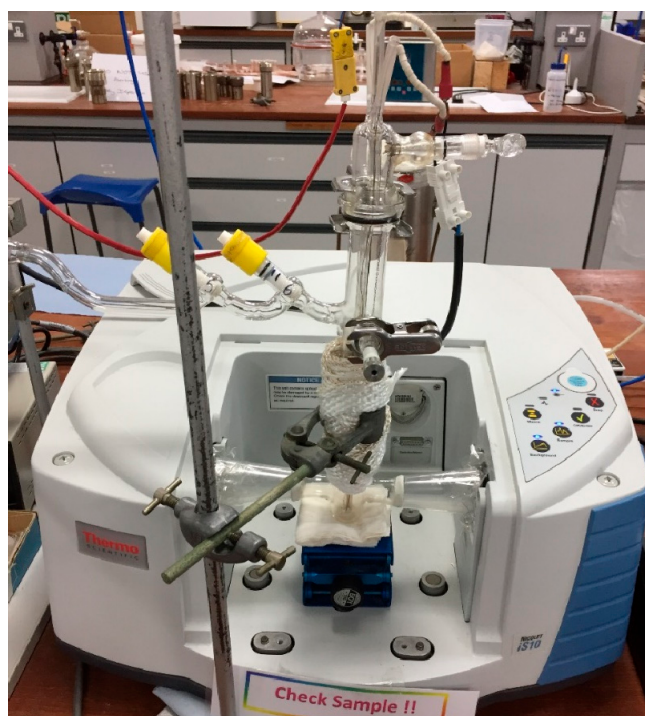

Figure S1 FTIR spectrometer and vacuum cell.

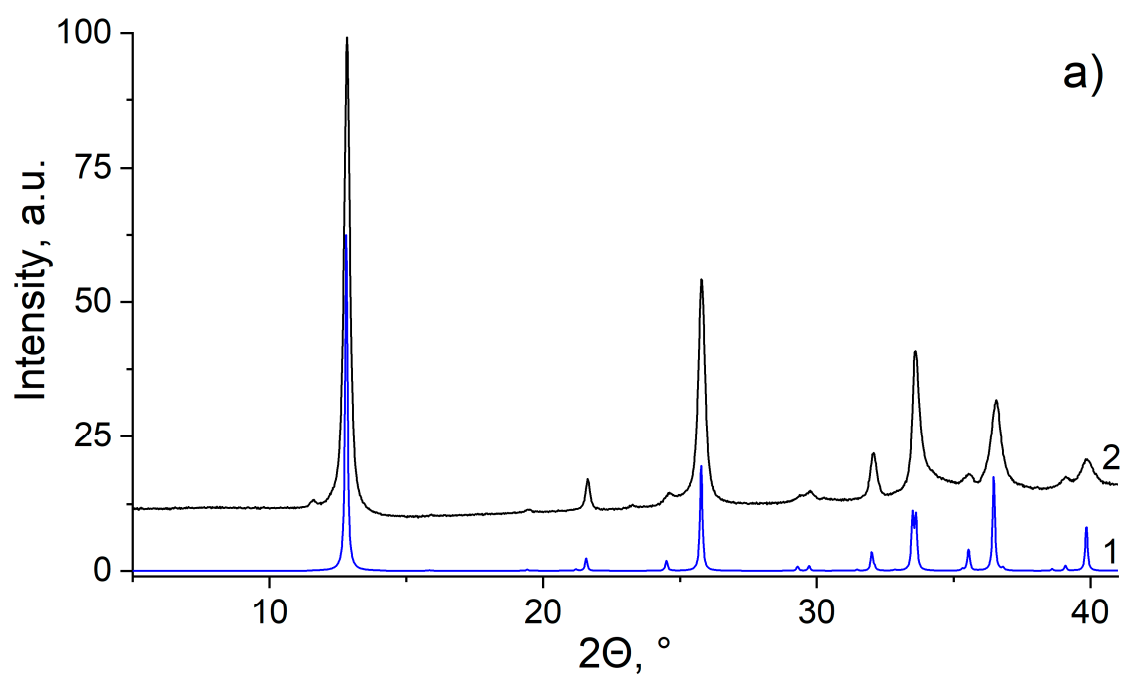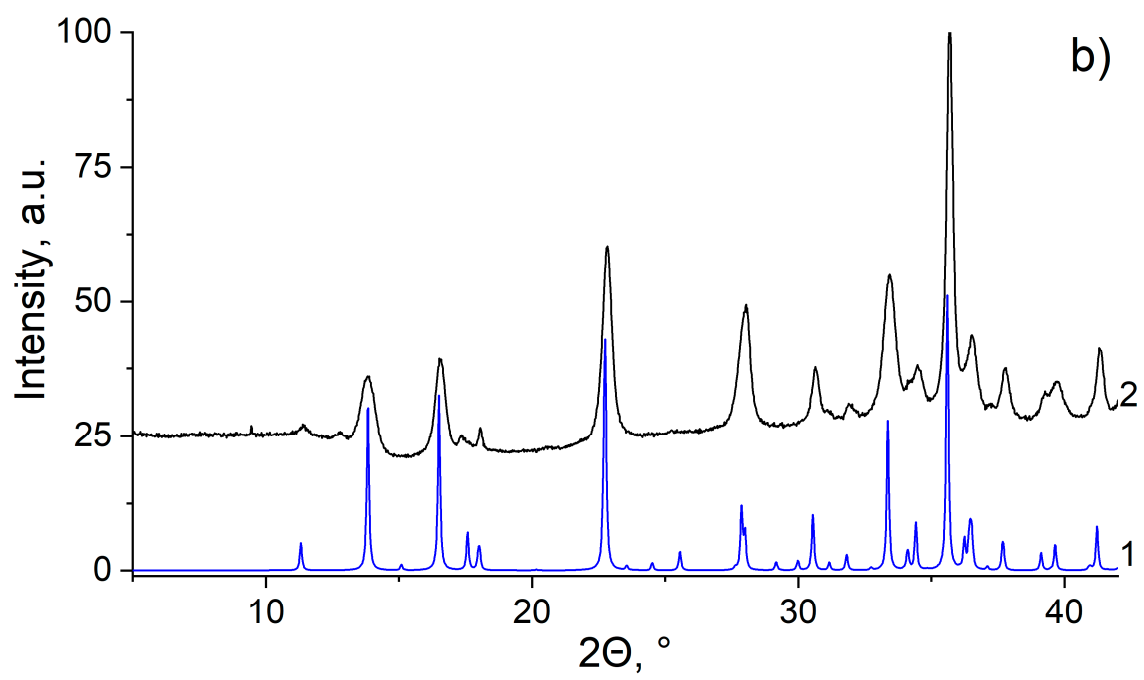

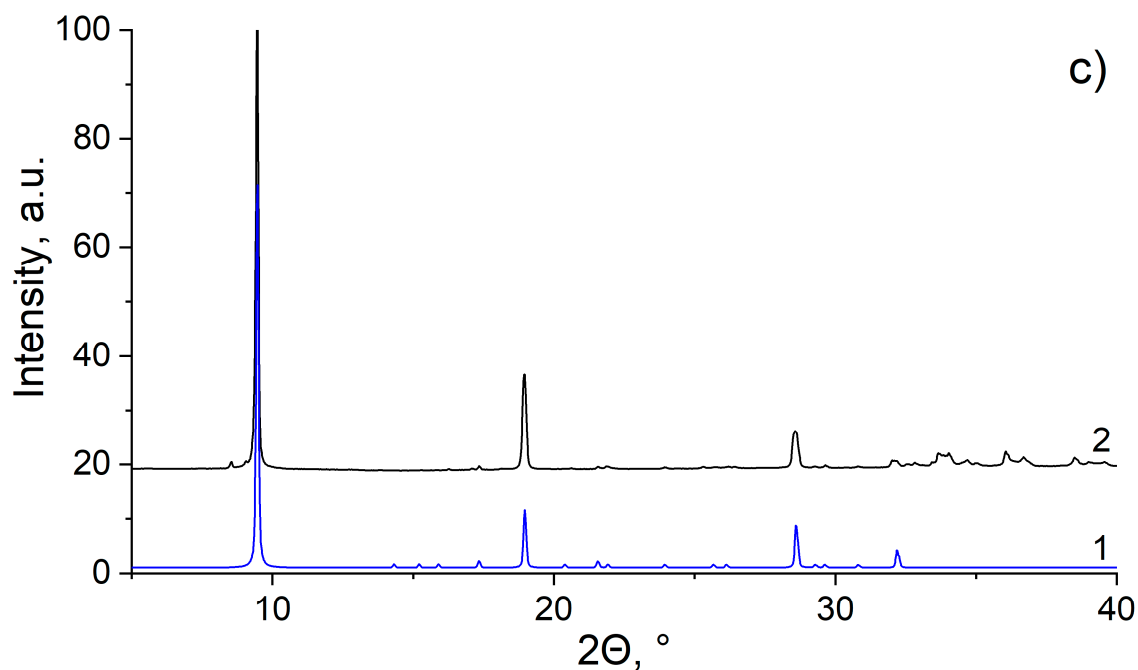

Figure S2 Calculated (1) and experimental (2) XRD patterns of  $\text{Cu}_2(\text{NO}_3)(\text{OH})_3$  (a),  $\text{CuSO}_4 \cdot 3\text{Cu}(\text{OH})_2$  (b) and  $[\text{Cu}(\text{OAc})_2]_2 \cdot \text{Cu}(\text{OH})_2 \cdot 5\text{H}_2\text{O}$  (c); calculated patterns are simulated from the structures deposited in ICSD and ICDD

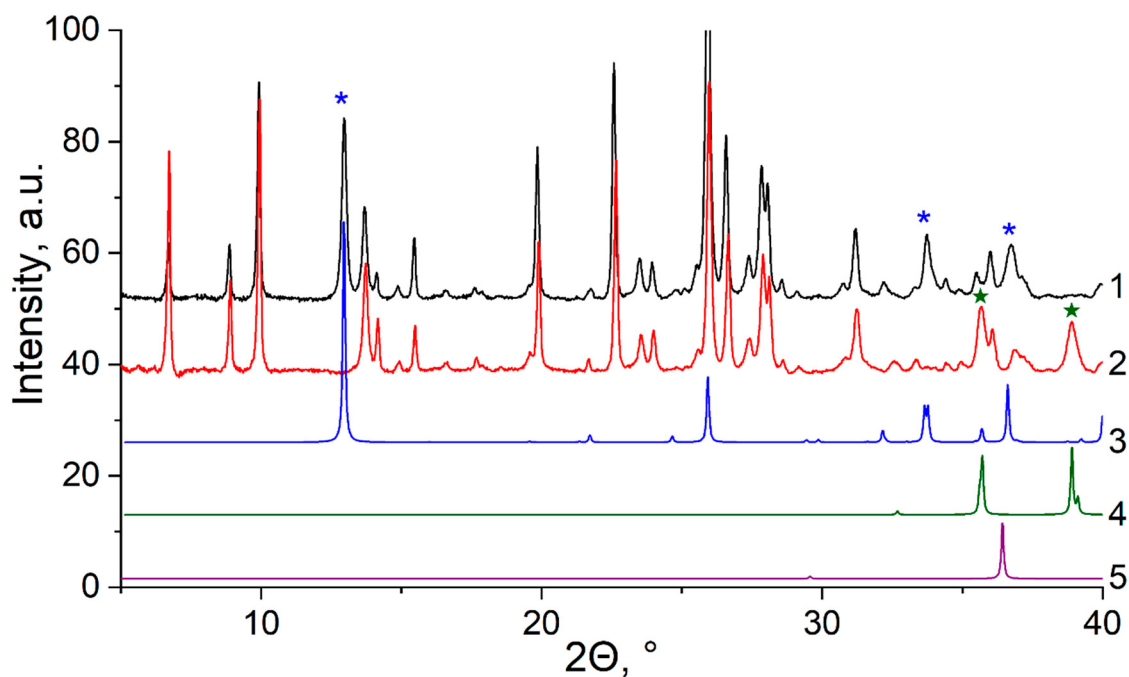

Figure S3 XRD patterns of MOR  $\text{Cu}(\text{NO}_3)_2$  before activation (1), MOR  $\text{Cu}(\text{NO}_3)_2$  after activation (2), the calculated pattern of  $\text{Cu}_2(\text{NO}_3)(\text{OH})_3$  (3), the calculated pattern of  $\text{CuO}$  (4), the calculated pattern of  $\text{Cu}_2\text{O}$  (5) patterns are offset and calculated patterns are scaled for clarity.

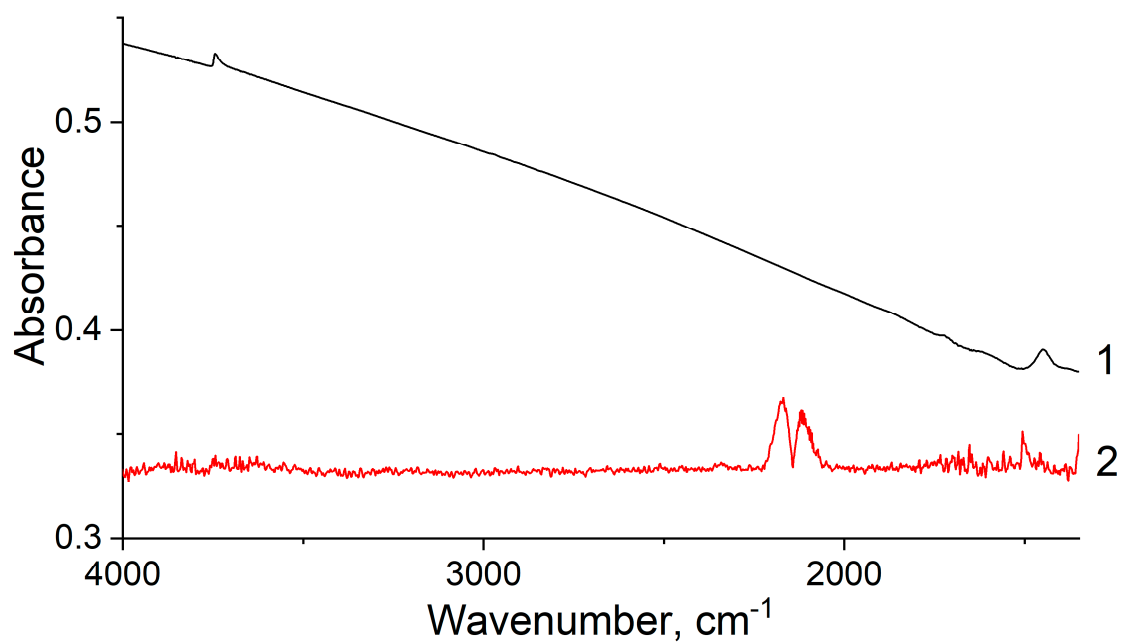

Figure S4 FTIR spectra of CO adsorbed on  $\text{Cu}(\text{NO}_3)_2$ -impregnated fumed silica (1) and 5000 ppm of  $\text{CO}^*$  (2), \* spectrum is offset and multiplied by 5 for clarity.

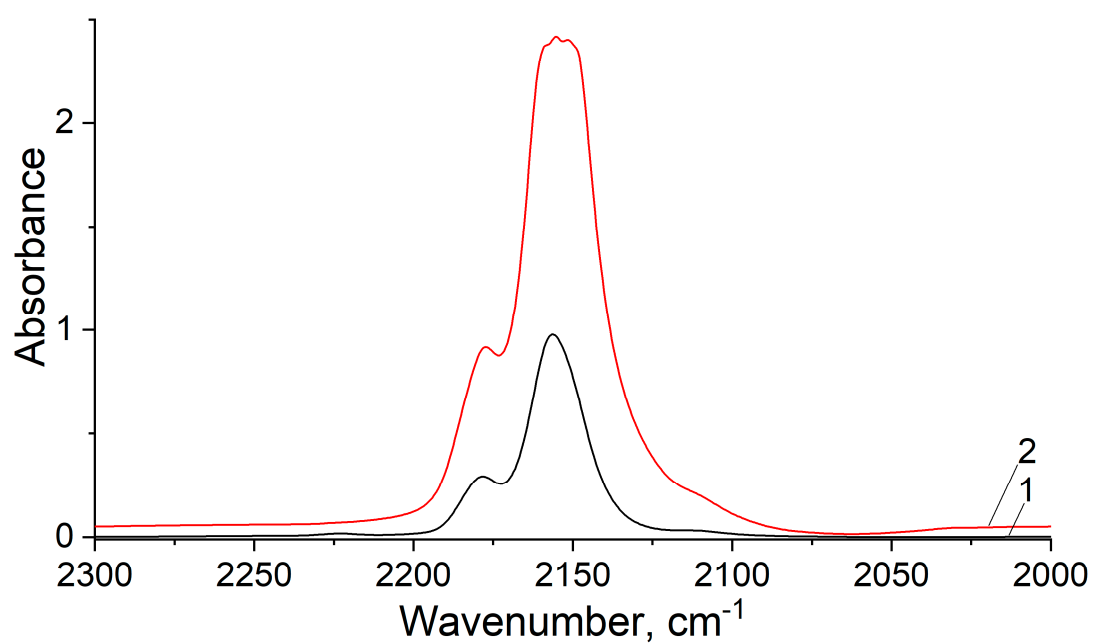

Figure S5 Difference FTIR spectra of CO adsorbed on MOR ion-exchanged (one) and impregnated (two) by  $\text{Cu}(\text{NO}_3)_2$  solution

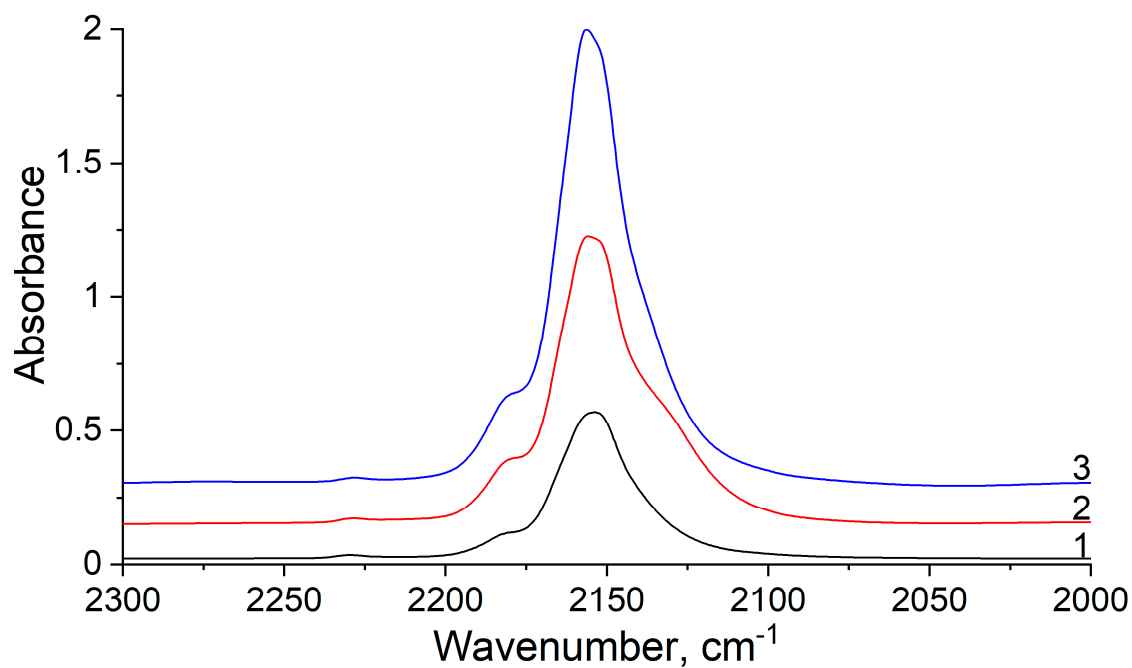

Figure S6 Difference FTIR spectra of CO adsorbed on BEA-12 impregnated with CuSO<sub>4</sub> (1), Cu(NO<sub>3</sub>)<sub>2</sub> (2), Cu(OAc)<sub>2</sub> (3), spectra are offset for clarity.

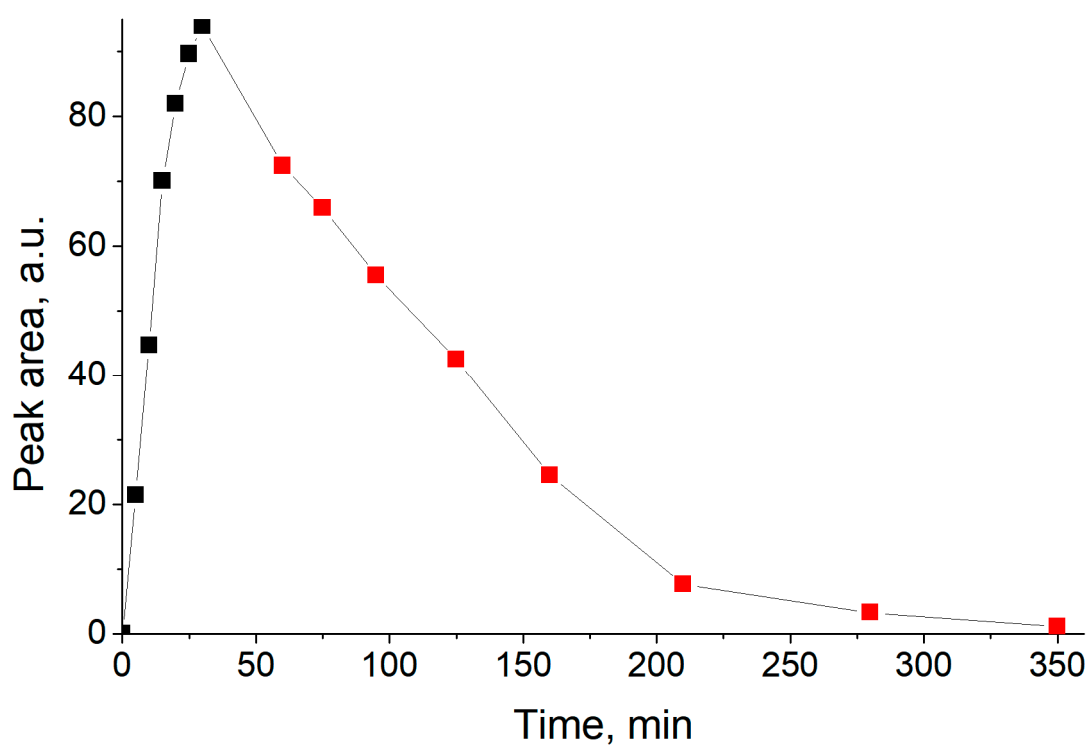

Figure S7 Time-dependent evolution of the IR peak area following CO adsorption on MOR-Cu(NO<sub>3</sub>)<sub>2</sub> (black) and evolution of IR peak area during stepwise desorption at different temperatures of CO on MOR-Cu(NO<sub>3</sub>)<sub>2</sub> (red).

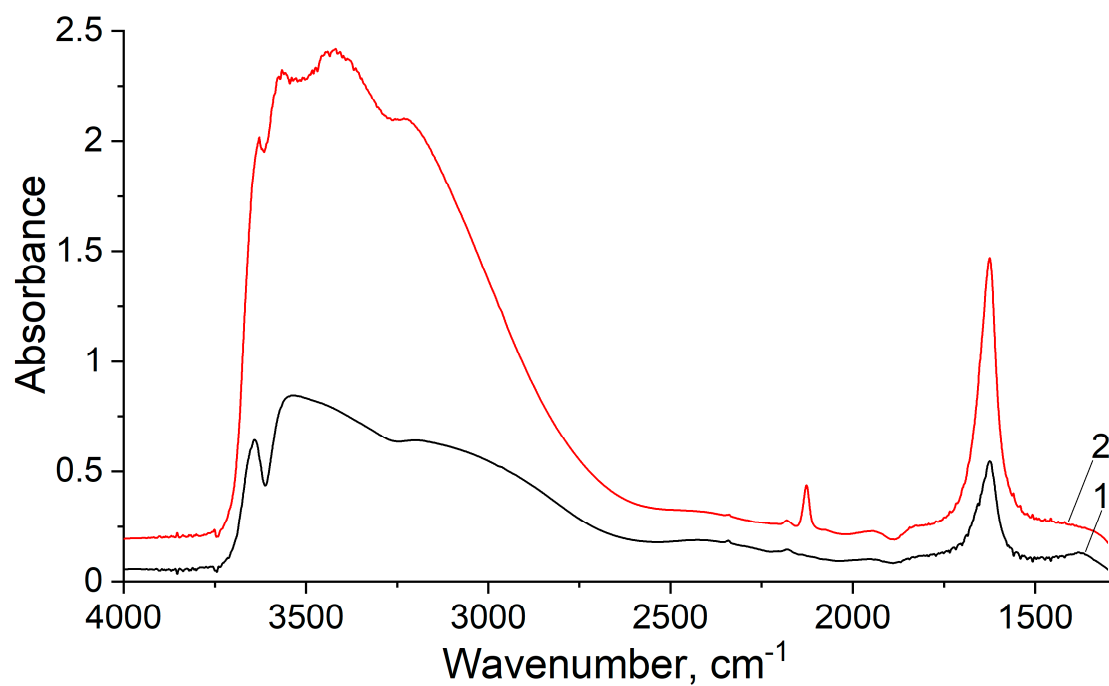

Figure S8 Difference FTIR spectra of  $\text{Cu}(\text{NO}_3)_2$ -impregnated MOR: exposed to air for 5 minutes (1), exposed to CO in the air for 2 minutes (2).

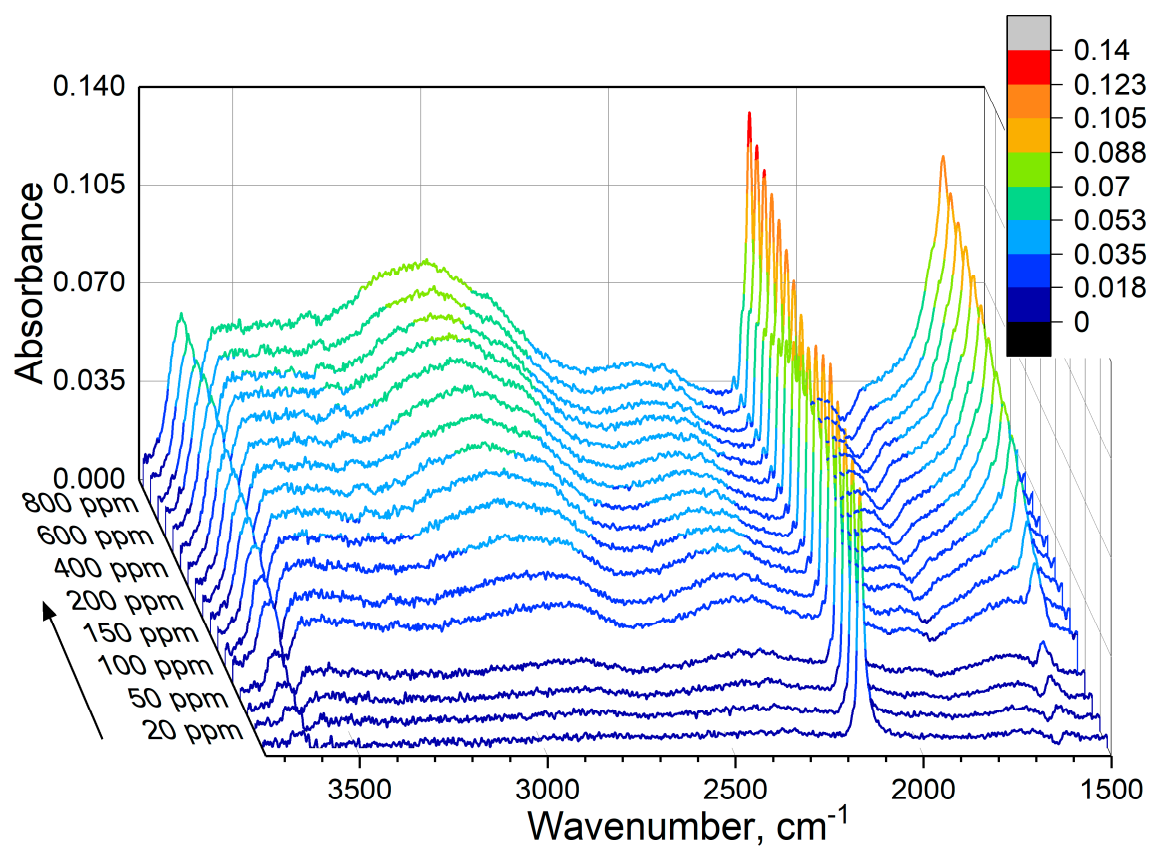

Figure S9 . Waterfall graph of difference FTIR spectra of CO adsorbed on CuMOR in Ar flow. For all waterfall sets of spectra, they are offset for clarity and the colour legend represents the absorbance scale.

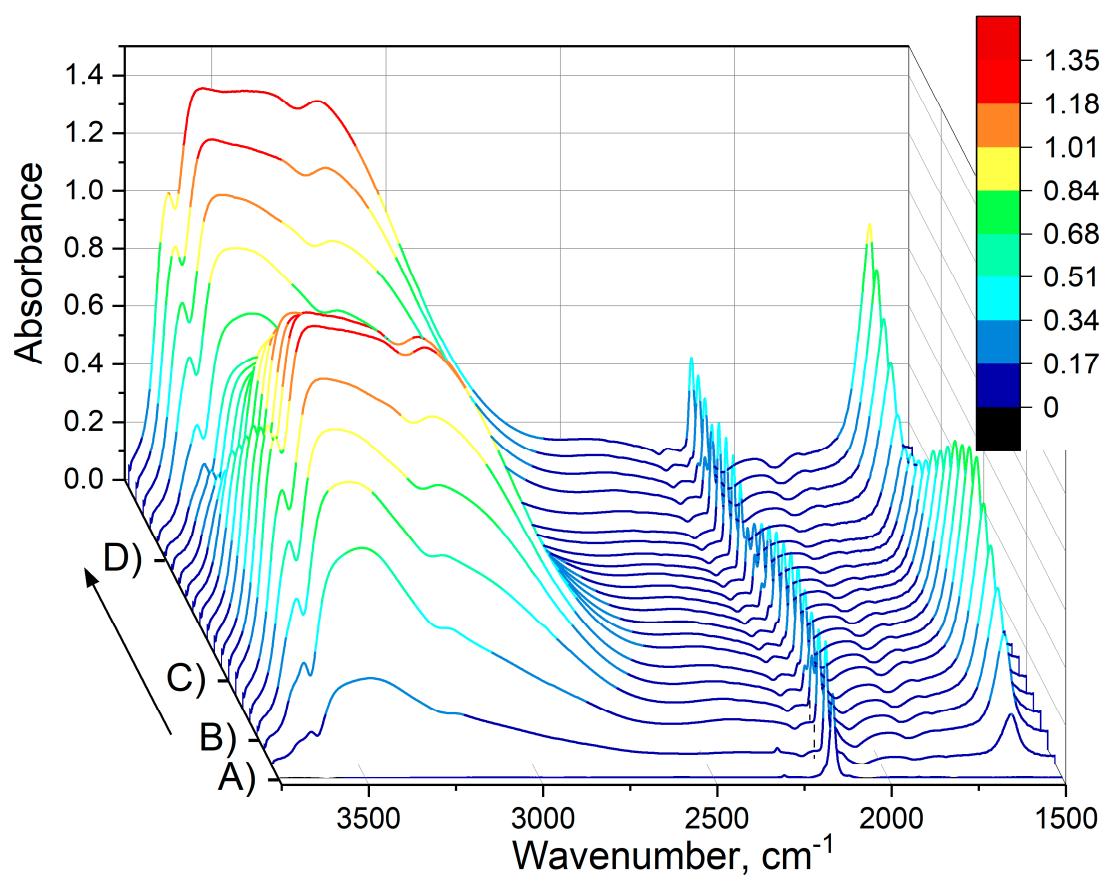

Figure S10 Waterfall graph of difference FTIR spectra of CO adsorbed on Cu(NO<sub>3</sub>)<sub>2</sub>-impregnated MOR, 50 ppm of CO adsorbed (step A) followed by stepwise H<sub>2</sub>O adsorption (step B), evacuation (step C) and H<sub>2</sub>O re-adsorption (step D).

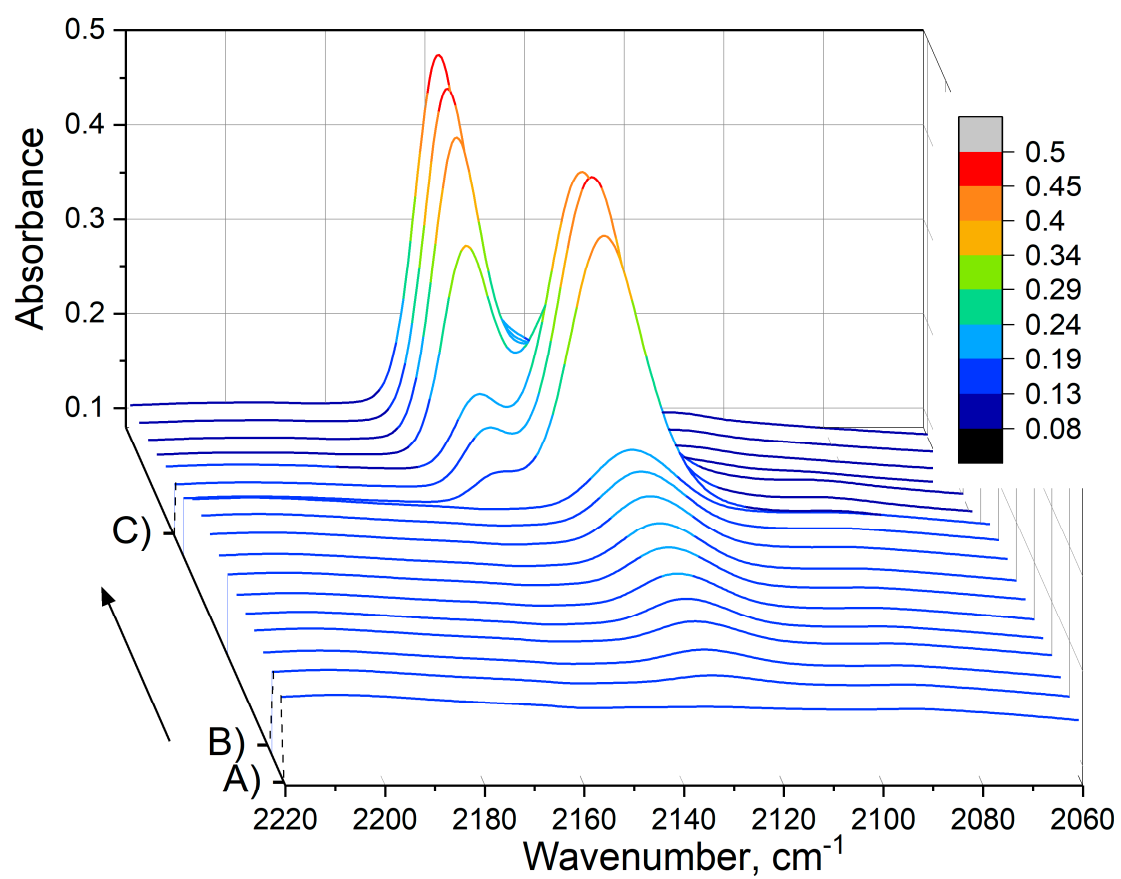

Figure S11 Waterfall graph of difference FTIR spectra of CO adsorbed on  $\text{Cu}(\text{NO}_3)_2$ -impregnated MOR after  $1\mu\text{L}$   $\text{H}_2\text{O}$  adsorption (step A), followed by CO introduction at different partial pressures (50-1000 ppm) (step B) and evacuation (step C).

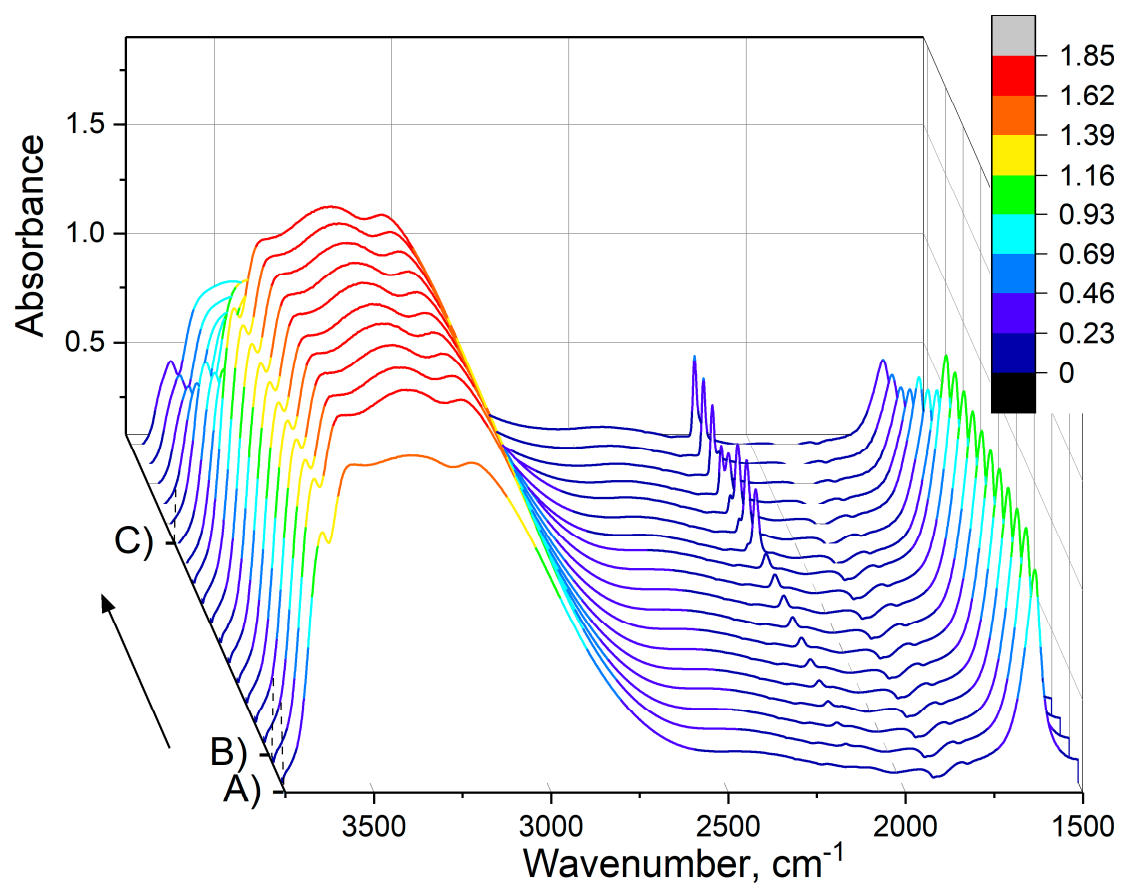

Figure S12 Waterfall graph of difference FTIR spectra of CO adsorbed on Cu(NO<sub>3</sub>)<sub>2</sub>-MOR after 1 μL H<sub>2</sub>O adsorption (step A), followed by CO introduction at different partial pressures (50-1000 ppm) (step B) and evacuation (step C).

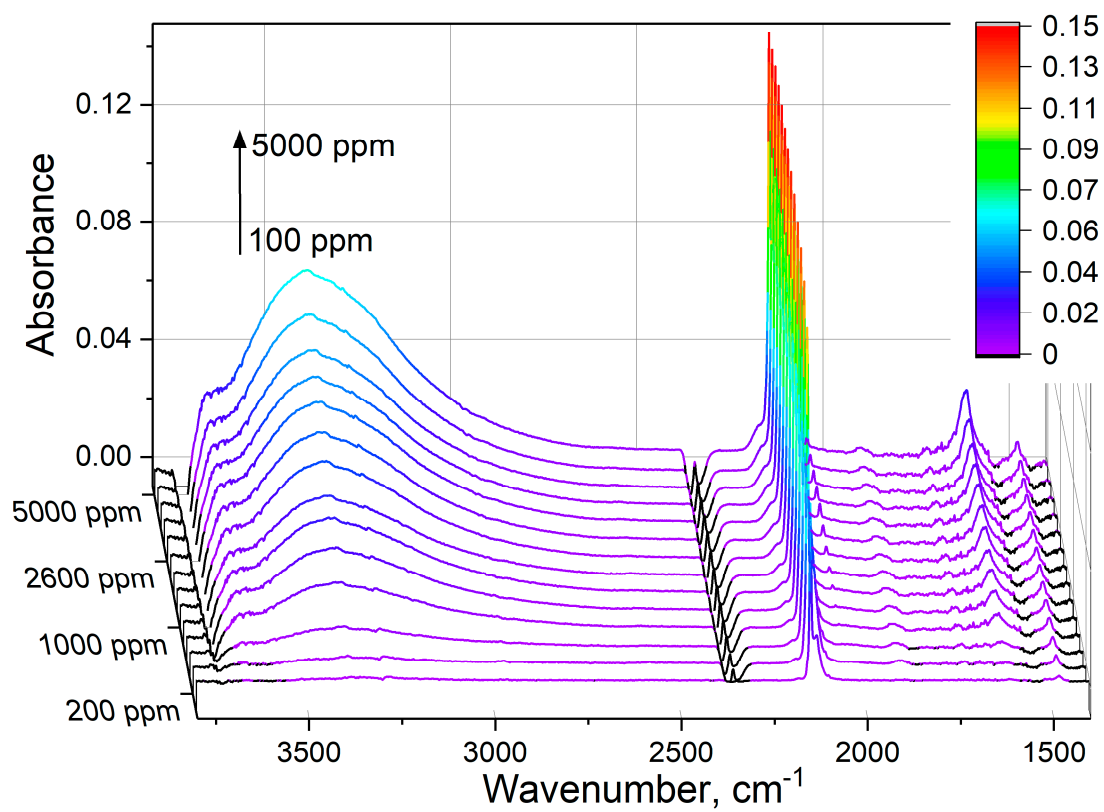

Figure S13 Difference FTIR spectra of CO adsorbed on CuSn-BEA, 100-5000 ppm (in Ar flow containing 100 ppm of water vapour).

### *In vacuo* CO – H<sub>2</sub>O coadsorption on CuSn-BEA

To evaluate the effect of water on CO adsorption on CuSn-BEA, an equivalent of 50 ppm of CO was introduced into the in situ vacuum cell (Figures S13-S15, step A), followed by step B, that is stepwise addition of 0.1  $\mu\text{L}$  H<sub>2</sub>O to the total of 0.5  $\mu\text{L}$ . In contrast to Cu(NO<sub>3</sub>)<sub>2</sub>-MOR (Figures 7a and 7b), the intensity of the 2149  $\text{cm}^{-1}$  peak is decreasing and the broad peak centred at 2132  $\text{cm}^{-1}$  splits into two unresolved peaks at 2138 and 2133  $\text{cm}^{-1}$ . The reversibility of water adsorption was tested by desorption over 45 minutes (step C), during which the intensity of the 2149  $\text{cm}^{-1}$  peak has completely recovered. Subsequently, during the water re-adsorption step (step D), a total of 1.6  $\mu\text{L}$  of H<sub>2</sub>O (an equivalent of  $\sim 2400$  ppm) was required to fully red-shift the 2149  $\text{cm}^{-1}$  band to 2132  $\text{cm}^{-1}$ .

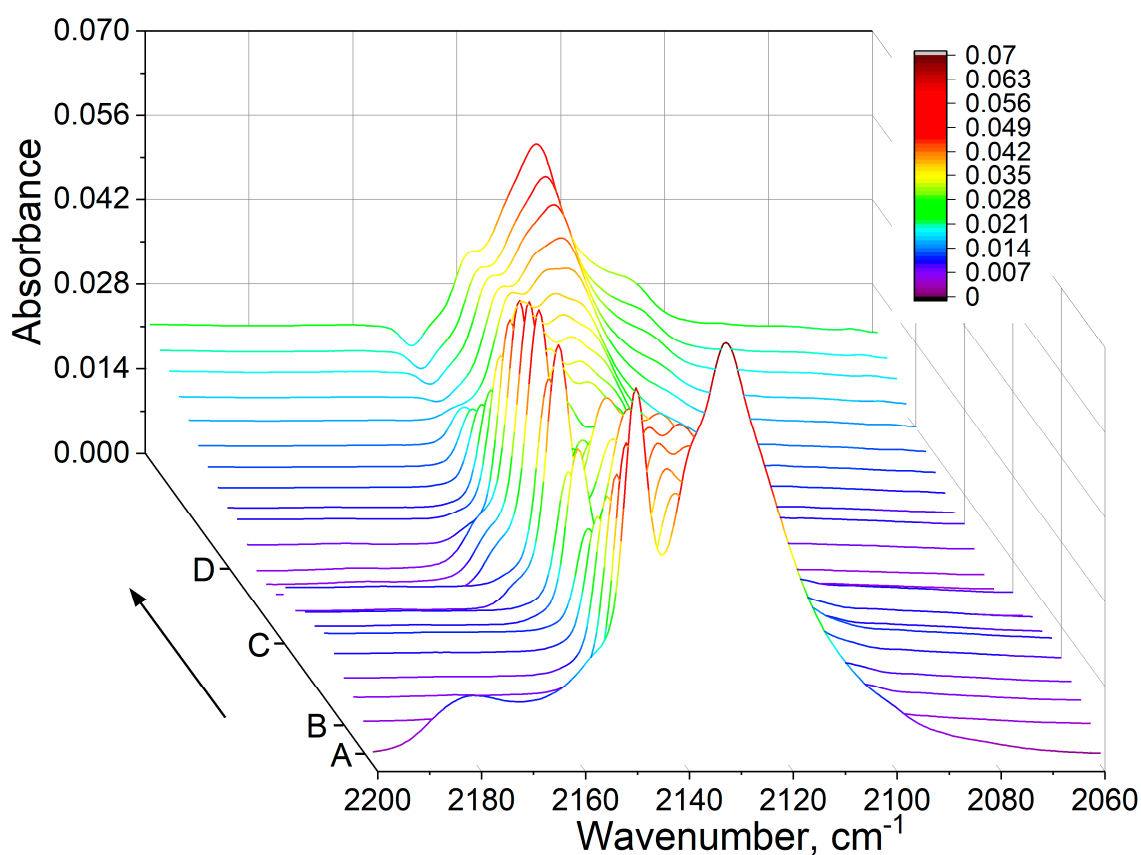

Figure S14 Waterfall graph of difference FTIR spectra of CO adsorbed on CuSn-BEA (step A), water interference experiment (step B) and desorption experiment (step C) and water readsorption (step D).

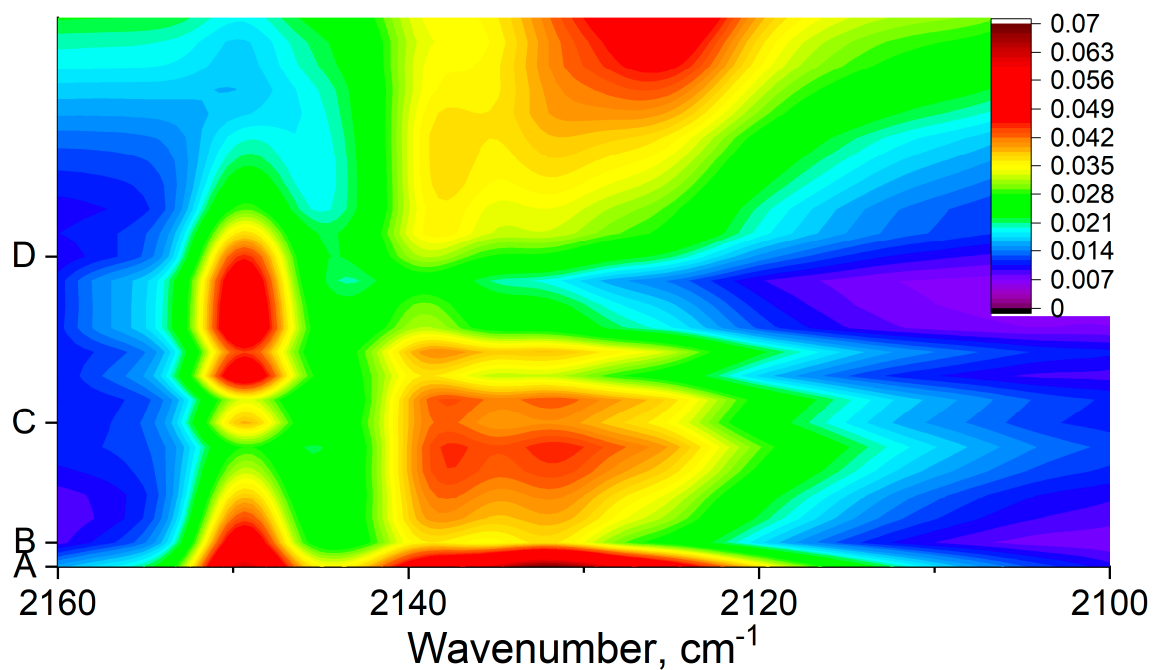

Figure S15 2D contour map of difference FTIR spectra of CO adsorbed on CuSn-BEA (step A), water interference experiment (step B) and desorption experiment (step C) and water re-adsorption (step D), colour legend represents the absorbance scale.

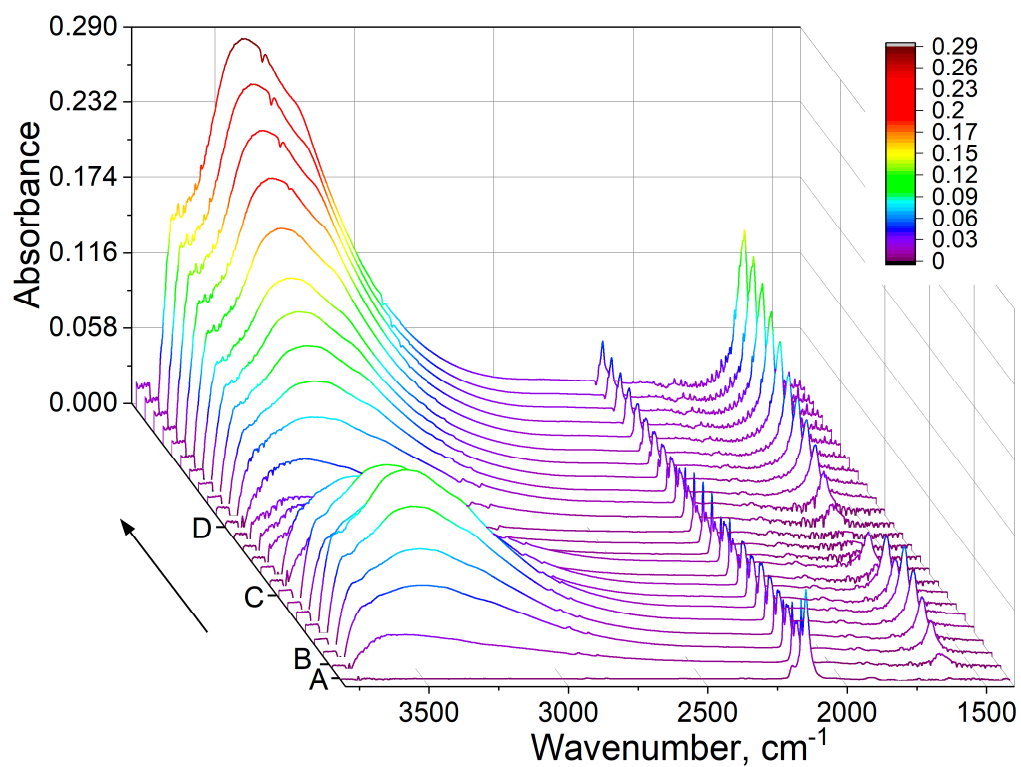

Figure S16. Waterfall graph of difference FTIR spectra of CO adsorbed on CuSn-BEA (step A), water interference experiment (step B) and desorption experiment (step C) and water readsorption (step D).

Finally, the CuSn-BEA sensor has been subjected to CO titration in the presence of H<sub>2</sub>O (an equivalent of ~1500 ppm, Figure S17). It can be observed that the 2149 cm<sup>-1</sup> peak is less intense than the broad peak centred at 2130 cm<sup>-1</sup>. At lower CO concentrations, the unresolved peaks at 2138 and 2133 cm<sup>-1</sup> are observed, which at higher CO concentrations are centred at 2129 cm<sup>-1</sup> (see also Figure 10a). The broad peak is marginally red-shifted to 2129 cm<sup>-1</sup>, but the water vapour is not interfering with the peak evolution, as it does with the MOR-Cu(NO<sub>3</sub>)<sub>2</sub> (Figure S11).

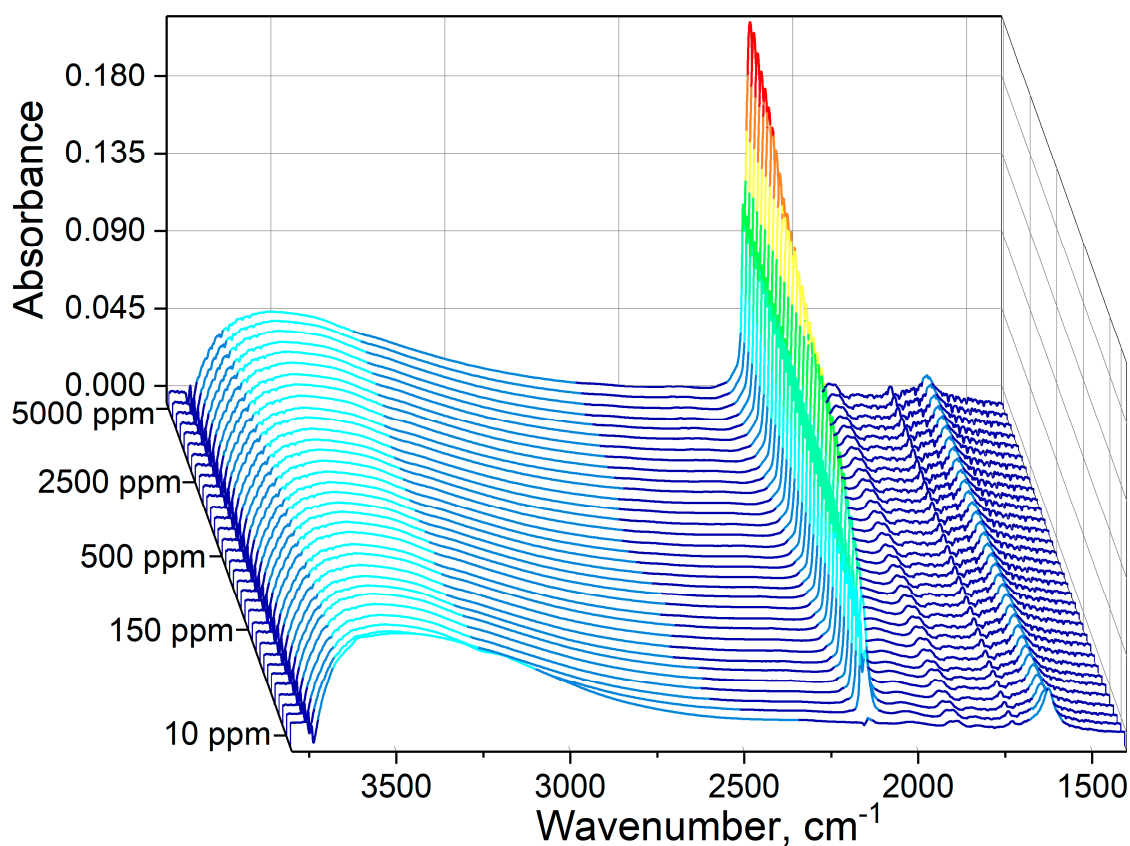

Figure S17. Waterfall graph of difference FTIR spectra of CuSn-BEA in vacuo after saturation with ~1500 ppm of H<sub>2</sub>O followed by CO adsorption, 10 to 5000 ppm.

## Supplementary information: Supplementary Characterisation File

### N<sub>2</sub> adsorption – desorption isotherms

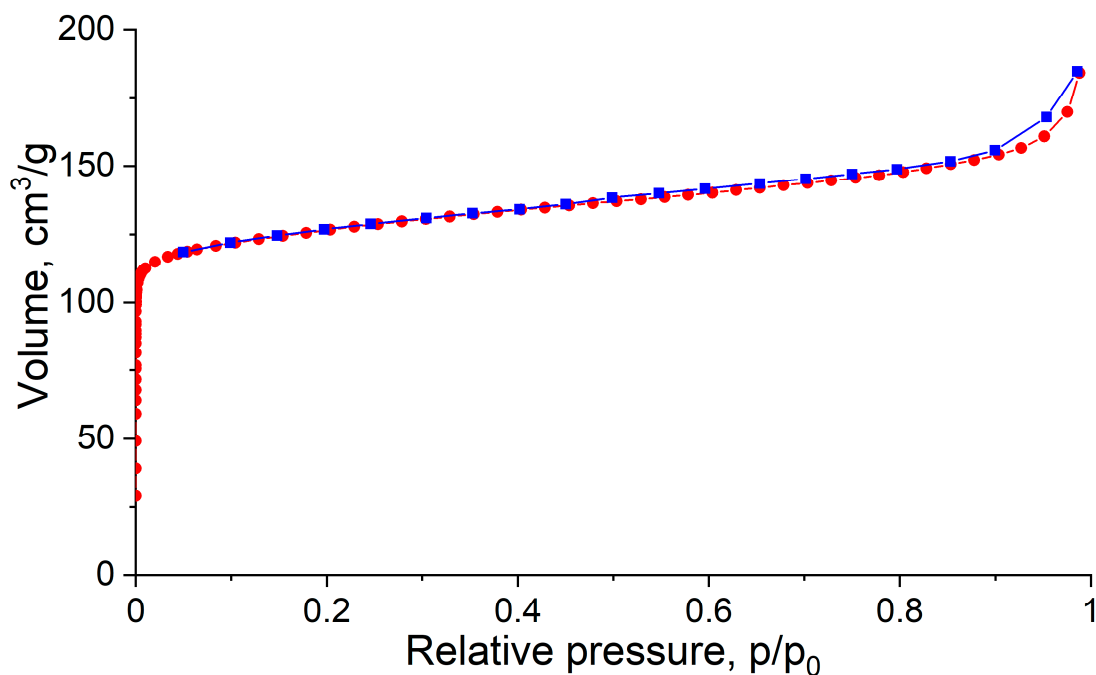

Figure S18 N<sub>2</sub> adsorption-desorption isotherm of NH<sub>4</sub>-MOR.

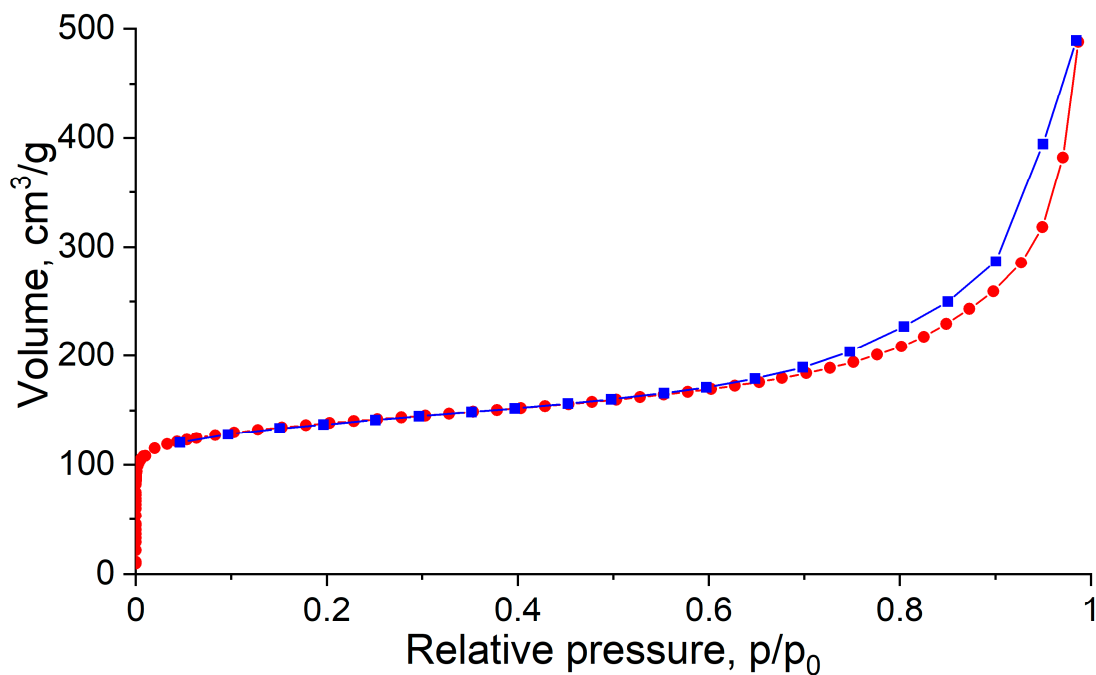

Figure S19 N<sub>2</sub> adsorption-desorption isotherm of BEA-12.

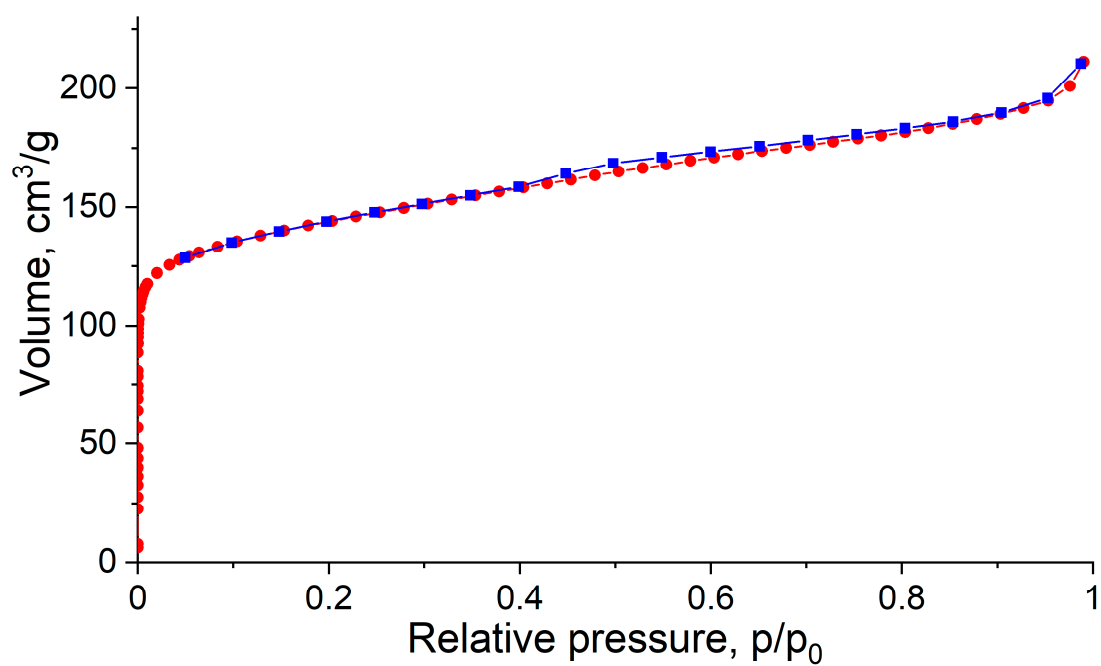

Figure S20 N<sub>2</sub> adsorption-desorption isotherm of BEA-19.

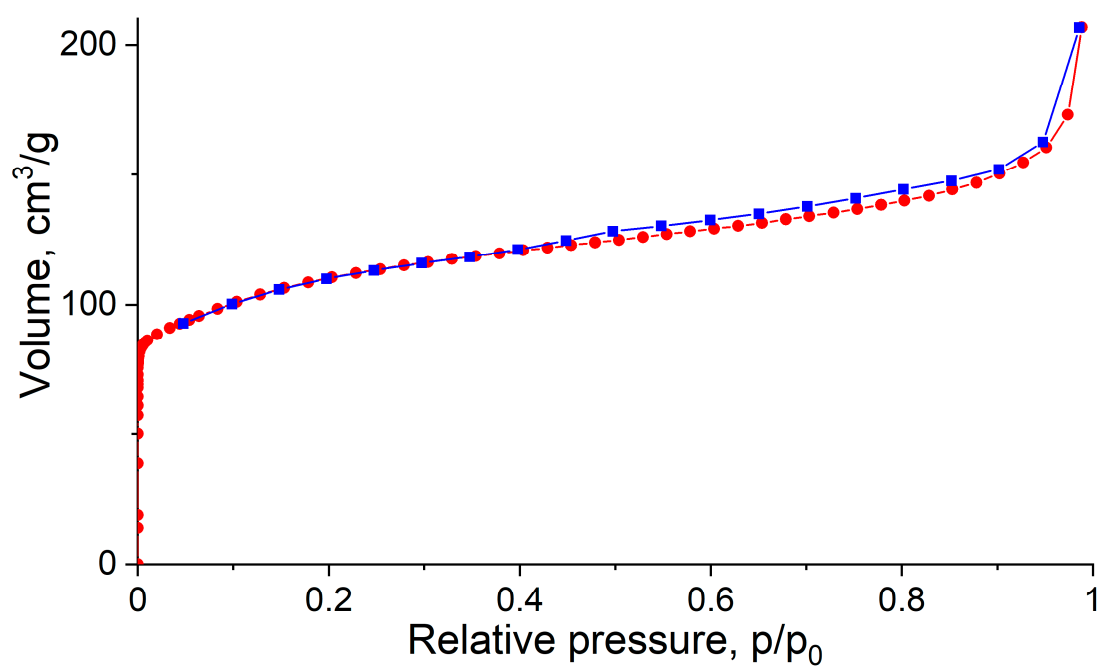

Figure S21 N<sub>2</sub> adsorption-desorption isotherm of ZSM-5.

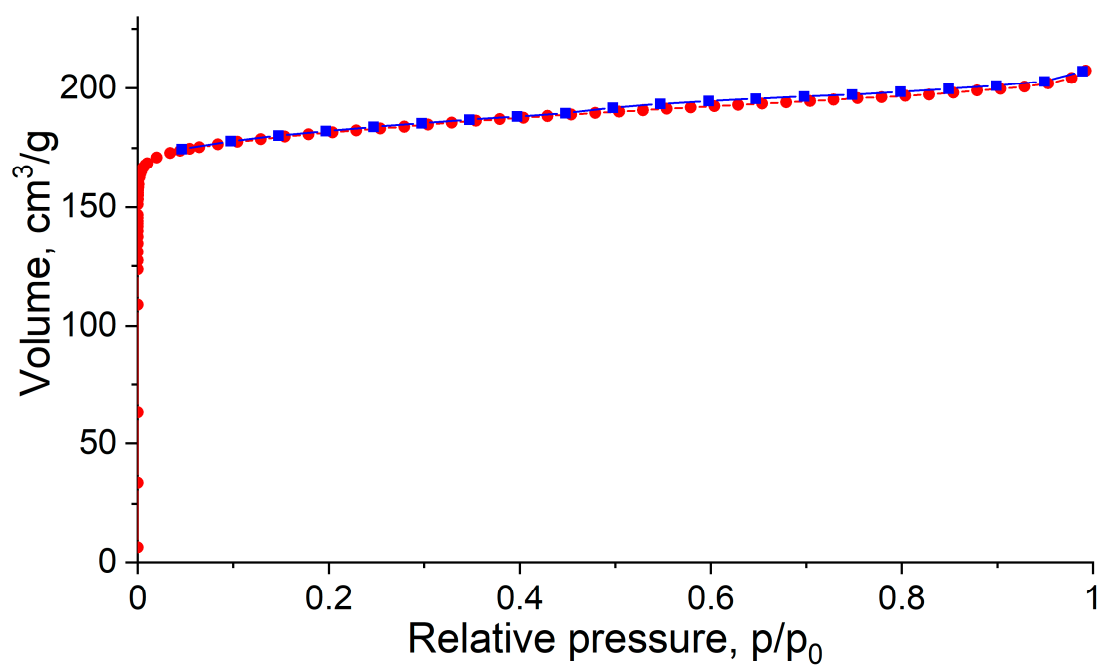

Figure S22 N<sub>2</sub> adsorption-desorption isotherm of NaX.

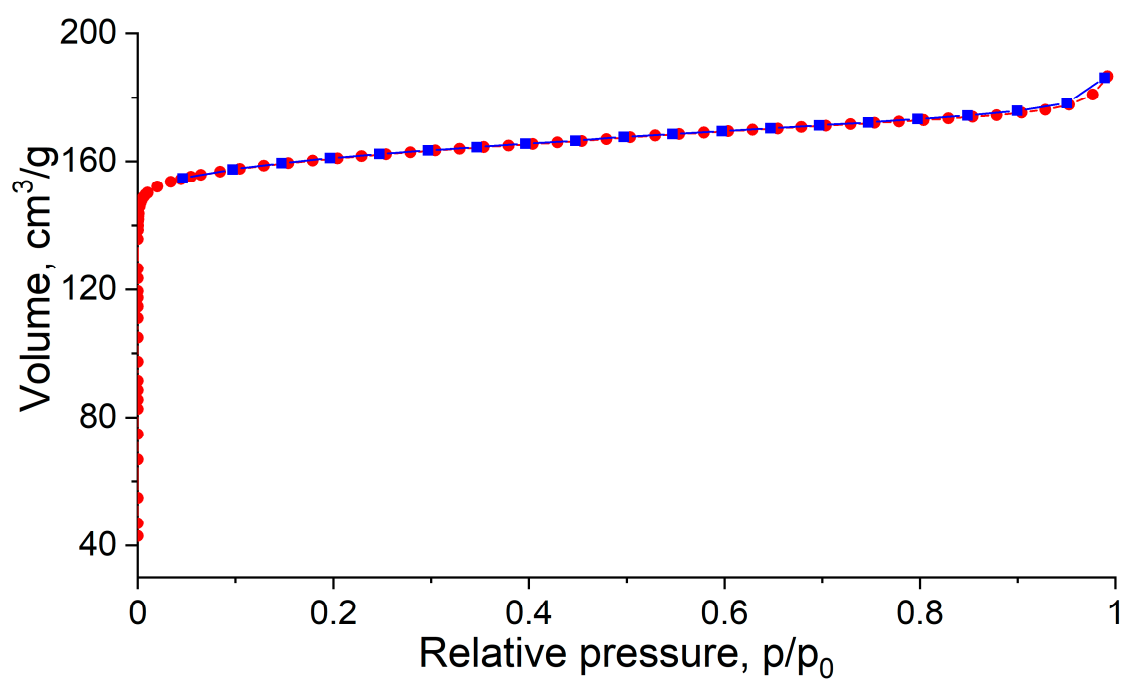

Figure S23 N<sub>2</sub> adsorption-desorption isotherm of NaY.

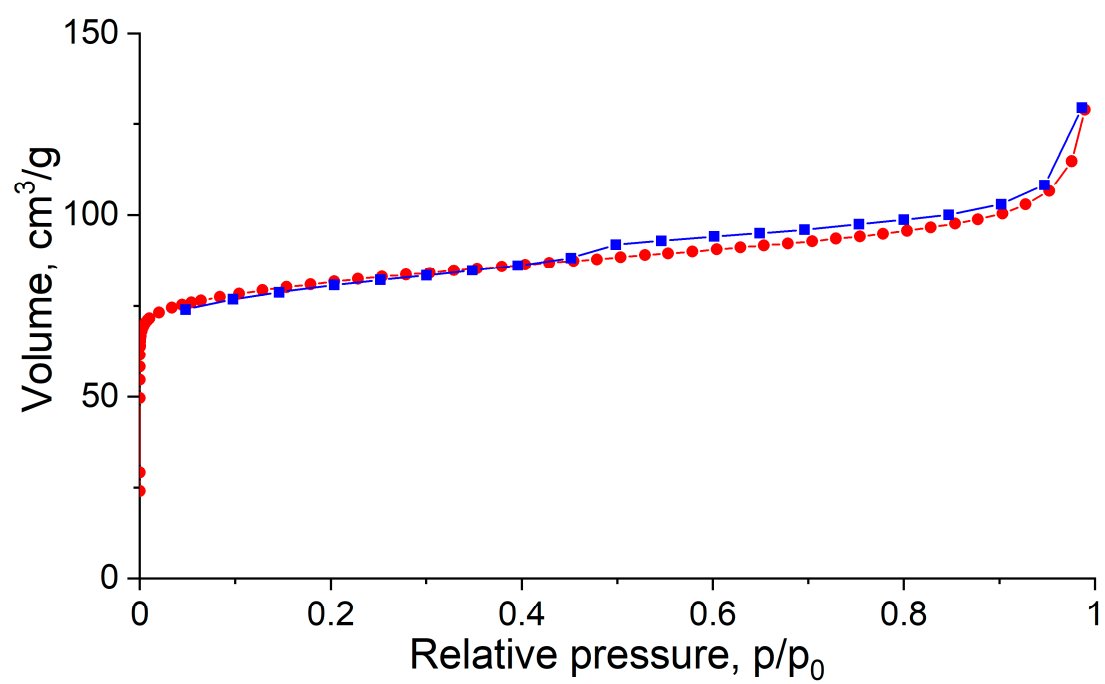

Figure S24 N<sub>2</sub> adsorption-desorption isotherm of FER.

## Powder X-ray diffraction patterns (XRD)

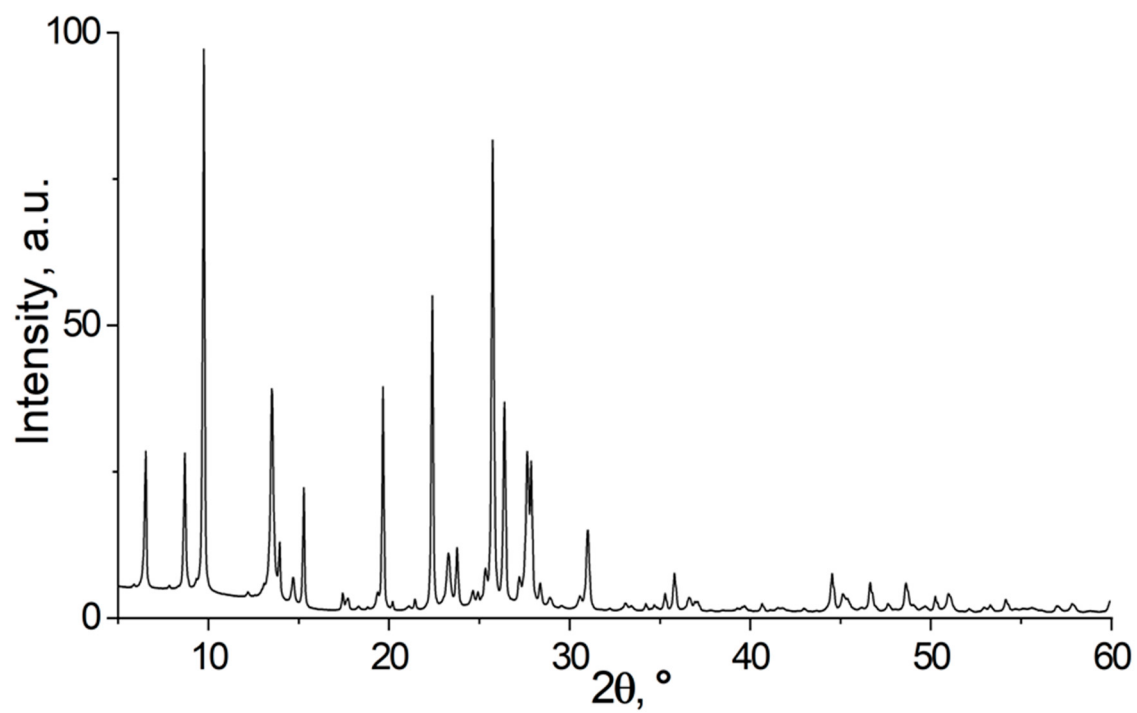

Figure S25 XRD pattern of MOR

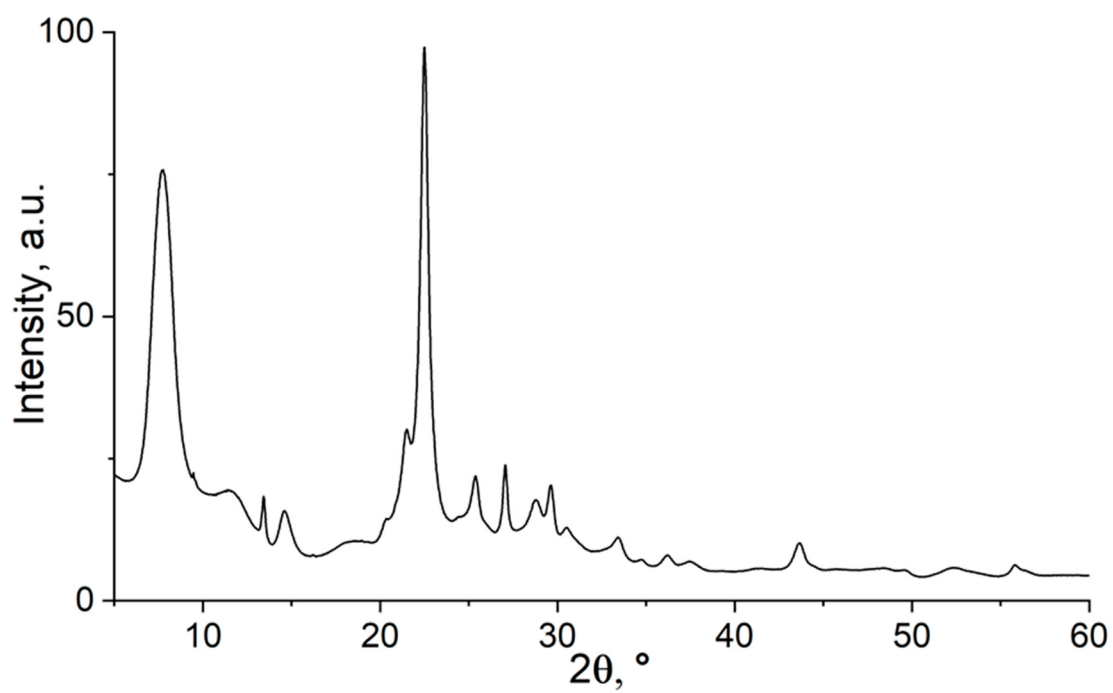

Figure S26 XRD pattern of BEA 12

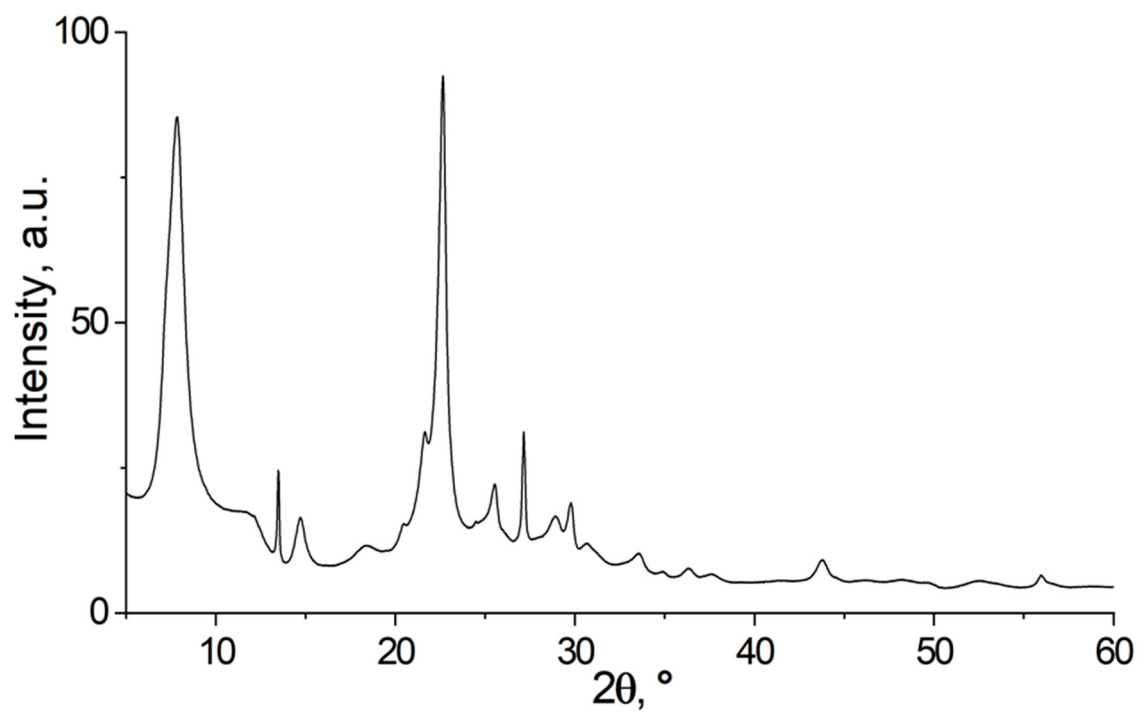

Figure S27 1 XRD pattern of BEA 19

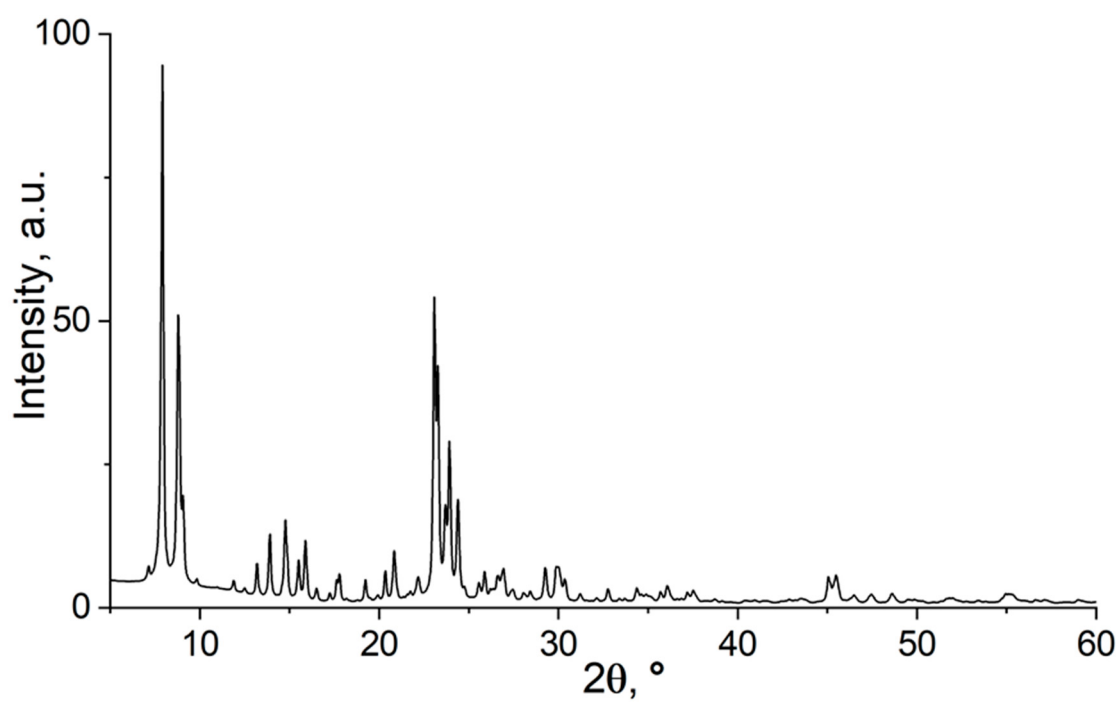

Figure S28 XRD pattern of ZSM-5

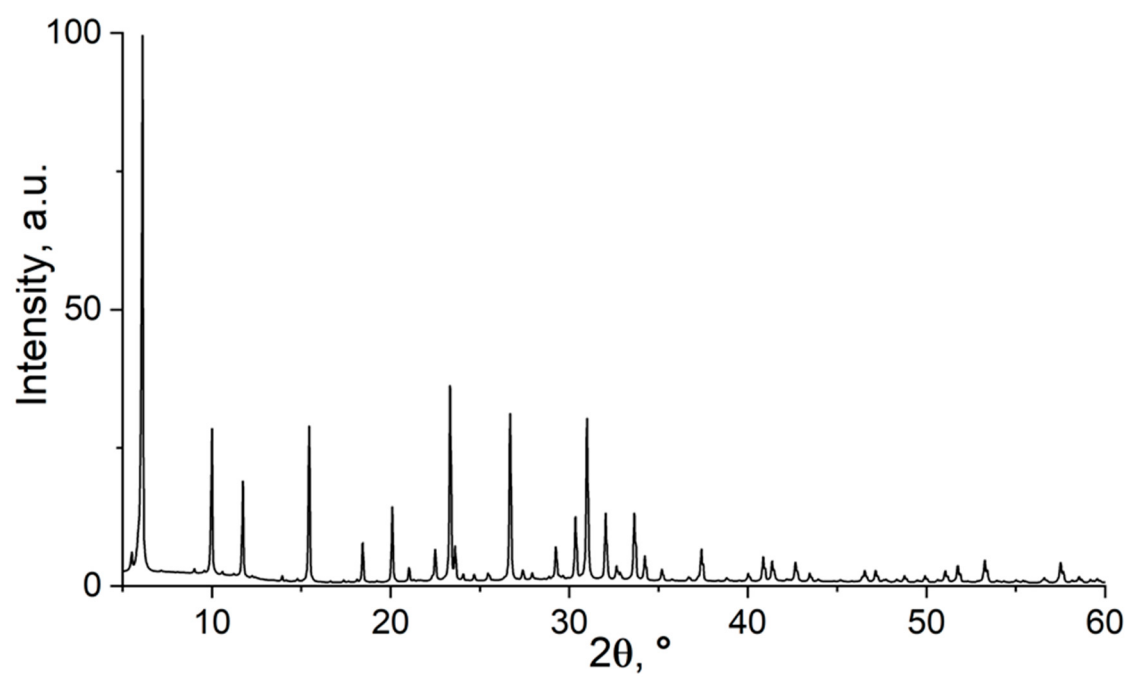

Figure S29 XRD pattern of NaX

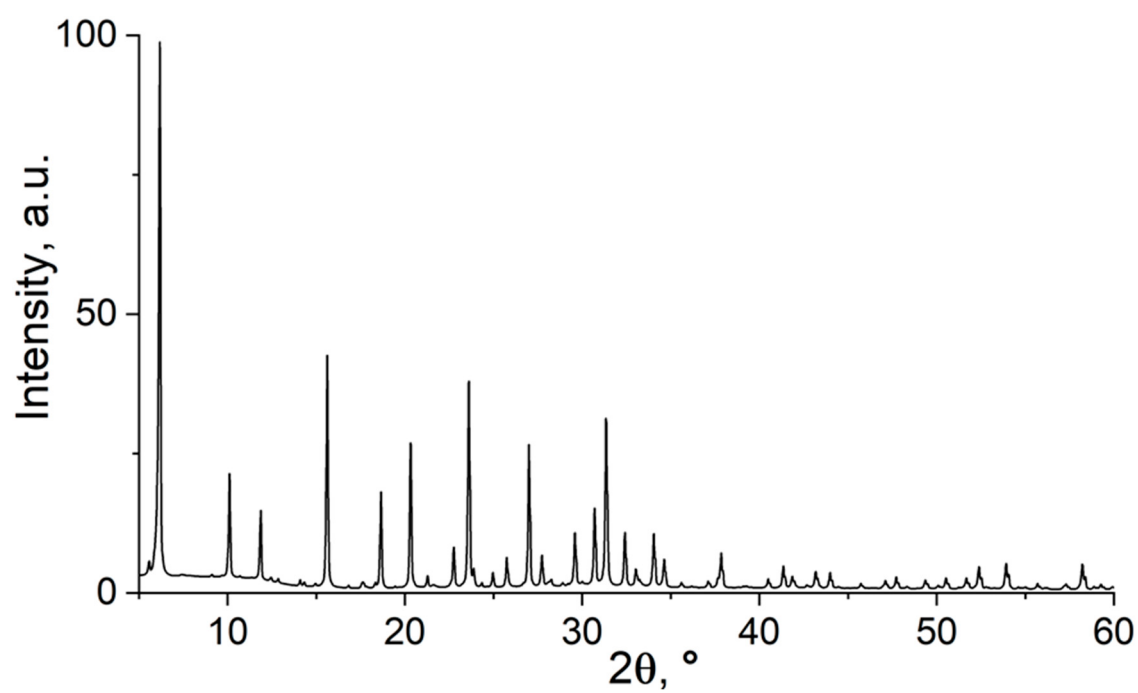

Figure S30 XRD pattern of NaY

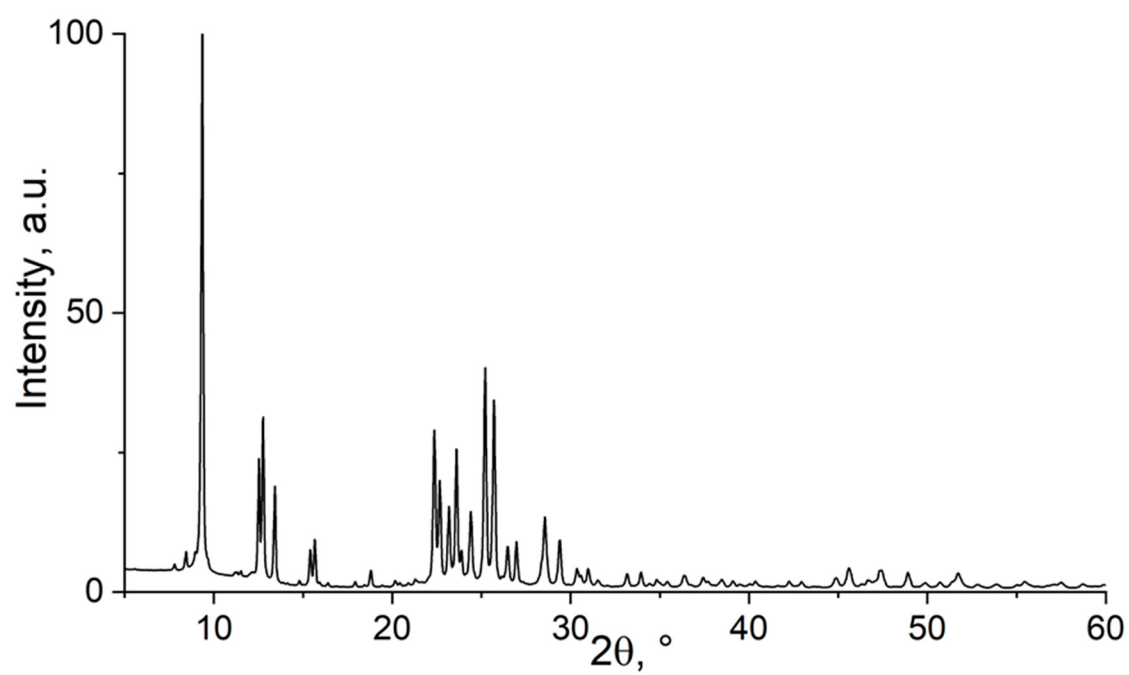

Figure S31 XRD pattern of FER

## Thermogravimetric analysis (TGA) curves

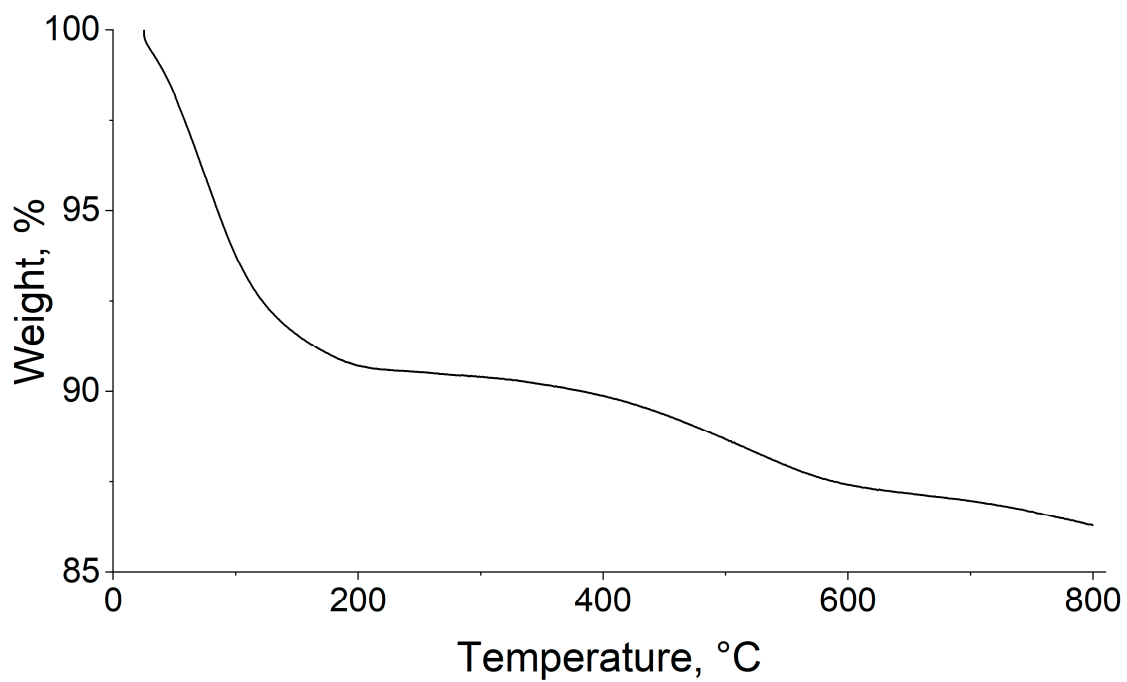

Figure S32 TGA curve of MOR.

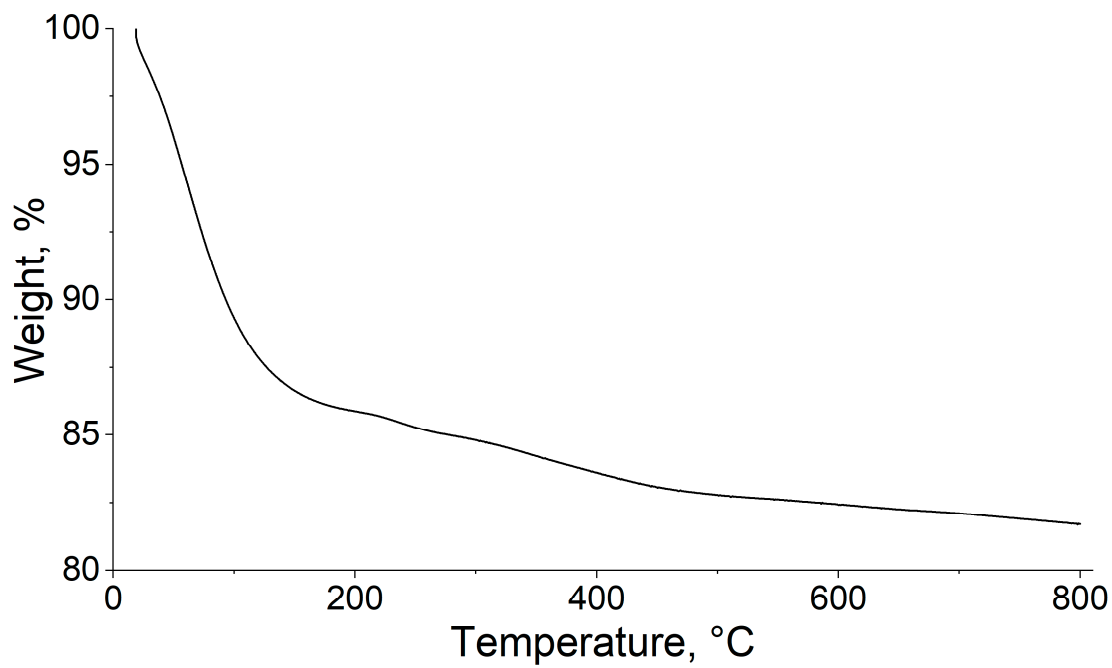

Figure S33 TGA curve of BEA-12.

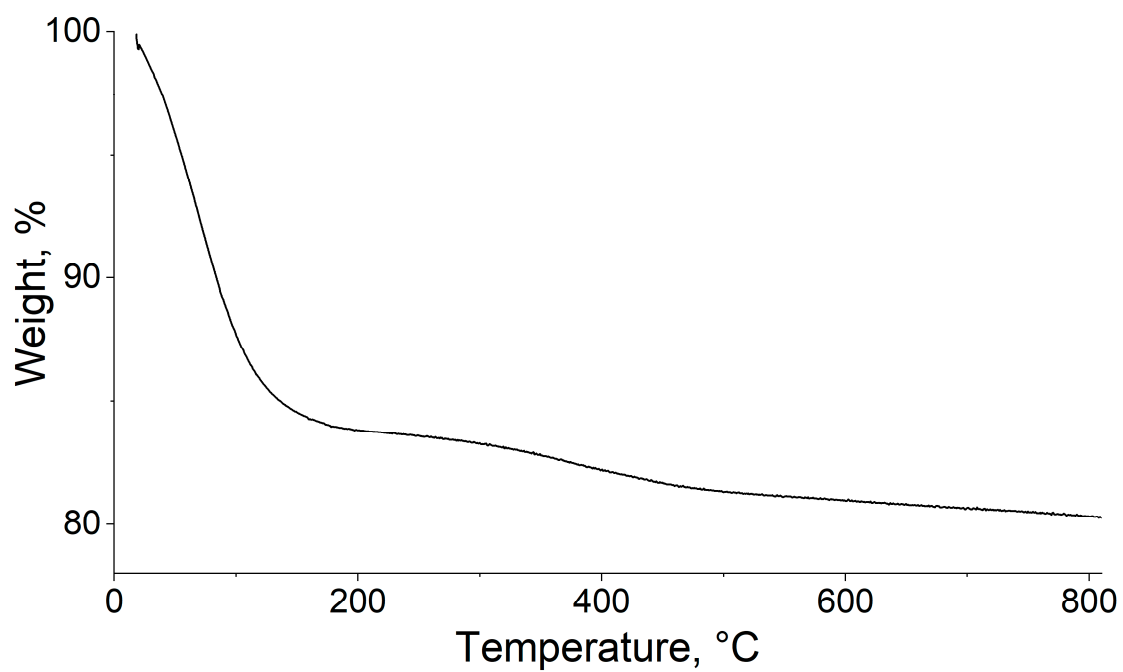

Figure S34 TGA curve of BEA-19.

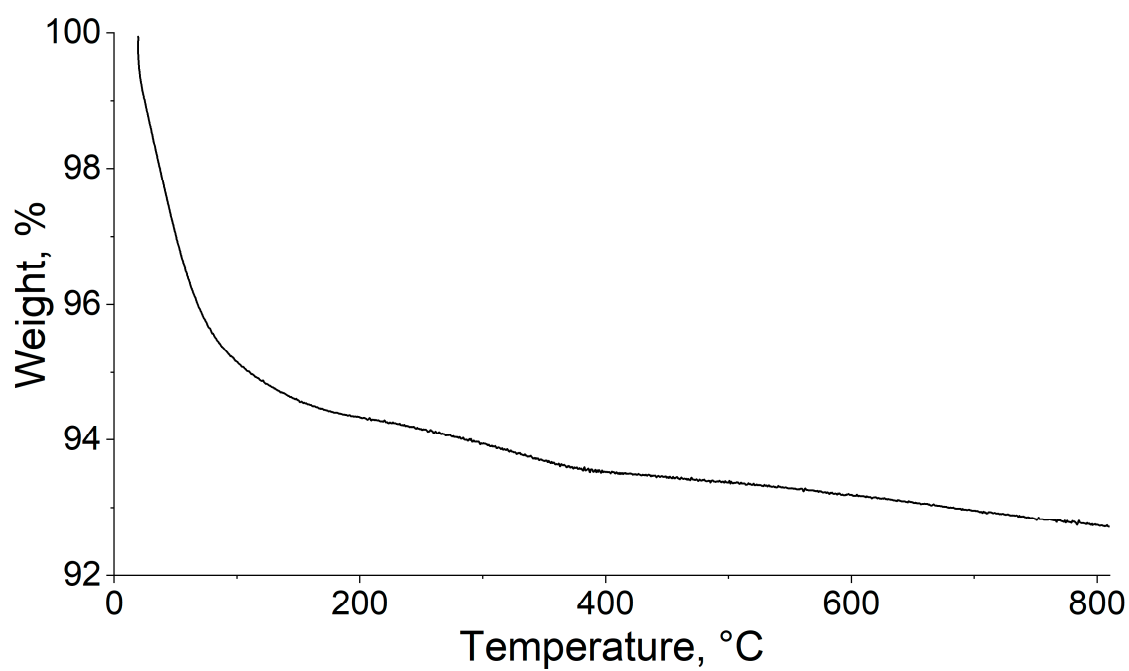

Figure S35 TGA curve of ZSM-5.

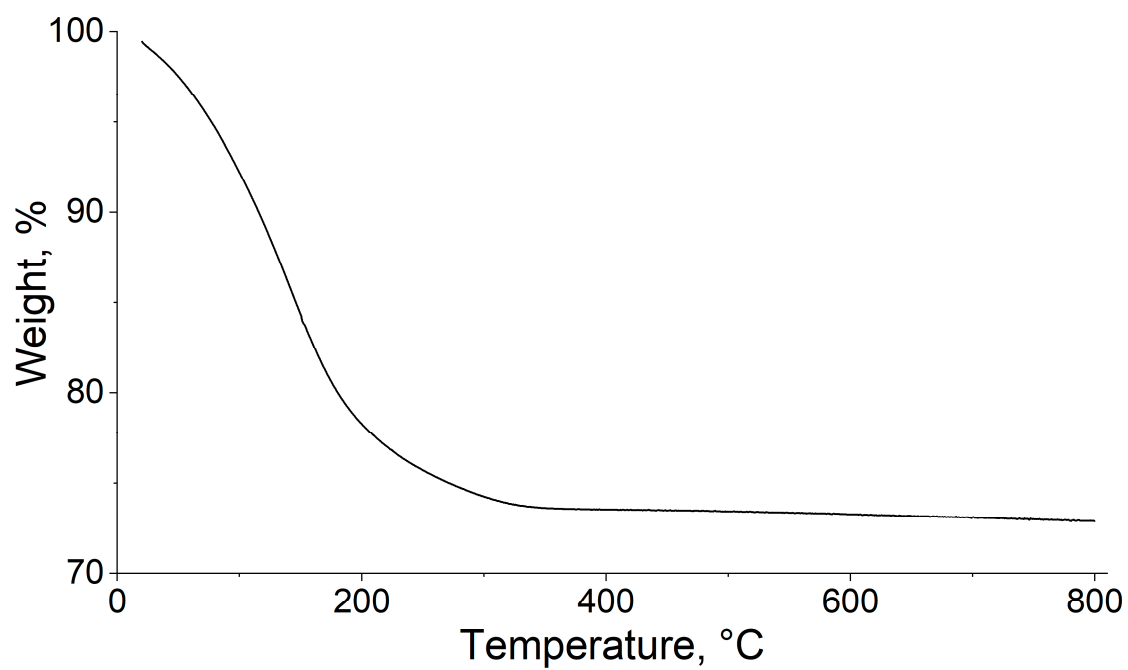

Figure S36 TGA curve of NaX.

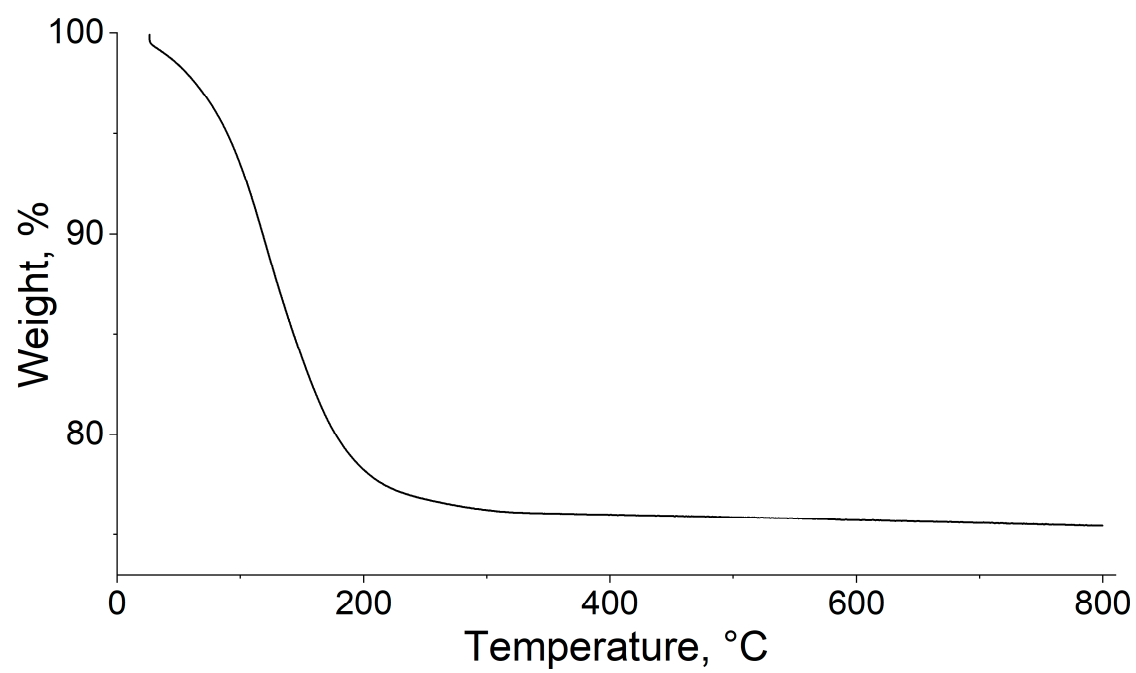

Figure S37 TGA curve of NaY.

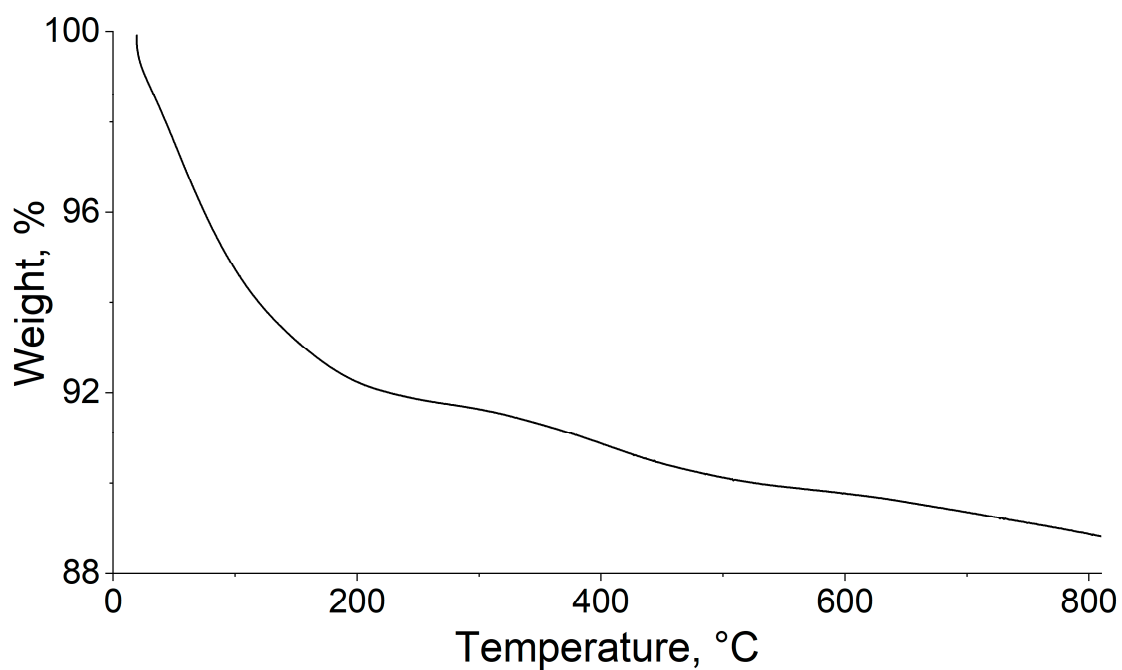

Figure S38 TGA curve of FER.

Table S2 TGA weight loSC data of reference samples at 200 °C and 400 °C.

| <b>Zeolite</b> | <b>Weight loSC at 200 °C, %</b> | <b>Weight loSC at 400 °C, %</b> |
|----------------|---------------------------------|---------------------------------|
| <b>MOR</b>     | 9.3                             | 10.12                           |
| <b>BEA 12</b>  | 14.13                           | 16.4                            |
| <b>BEA 19</b>  | 16.2                            | 17.79                           |
| <b>ZSM-5</b>   | 5.67                            | 6.48                            |
| <b>NaX</b>     | 21.74                           | 26.45                           |
| <b>NaY</b>     | 21.77                           | 24.01                           |
| <b>FER</b>     | 7.76                            | 9.14                            |

## FTIR spectra

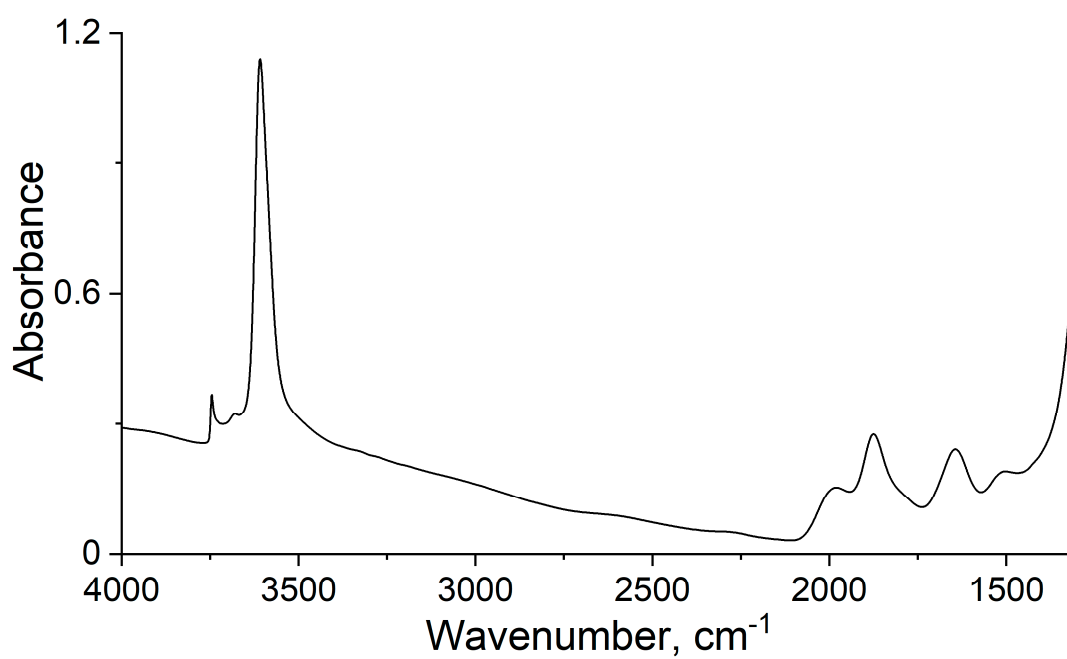

Figure S39 FTIR spectrum of MOR

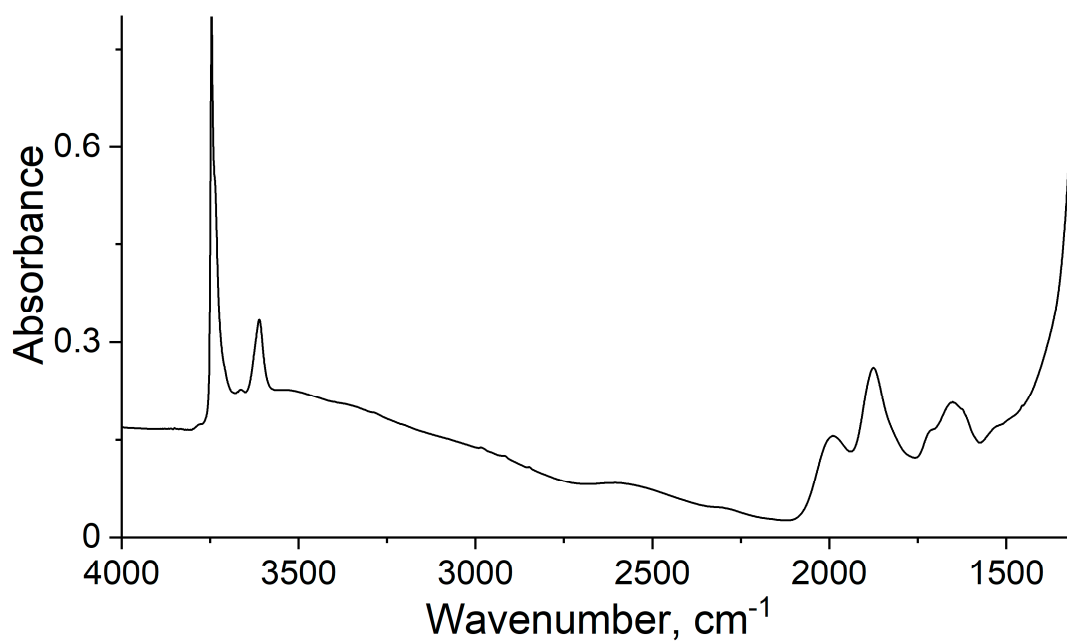

Figure S40 FTIR spectrum of BEA-12

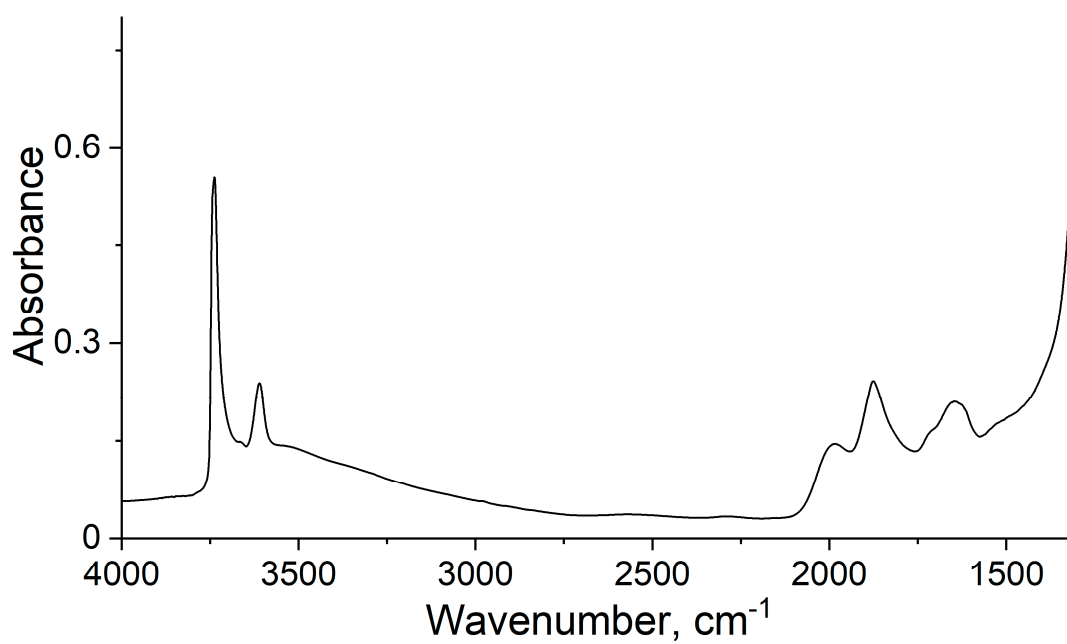

Figure S41 FTIR spectrum of BEA-19

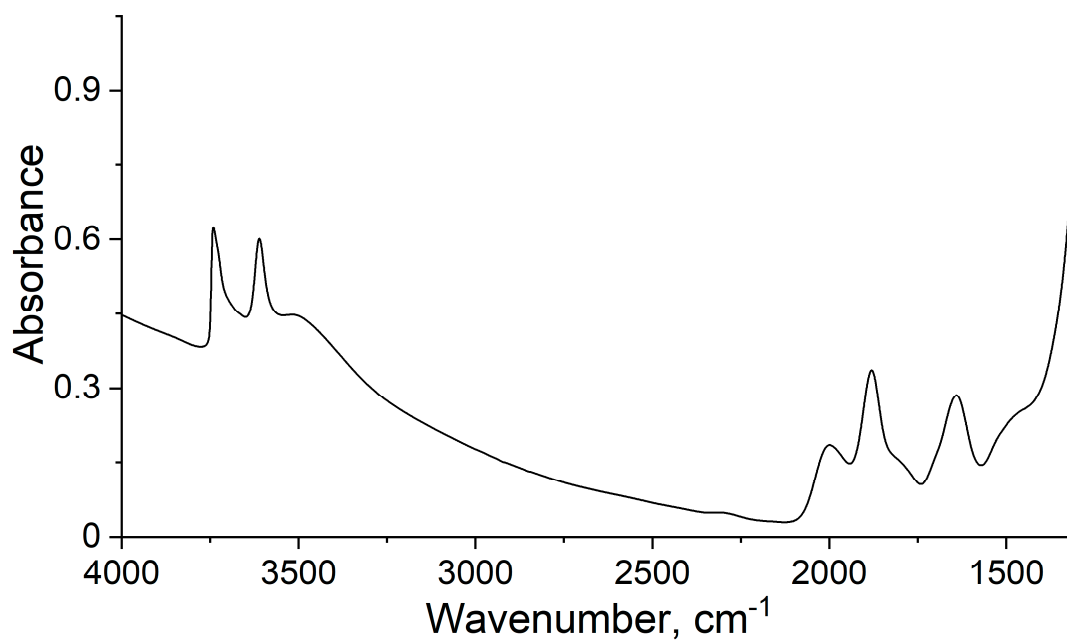

Figure S42 FTIR spectrum of ZSM-5

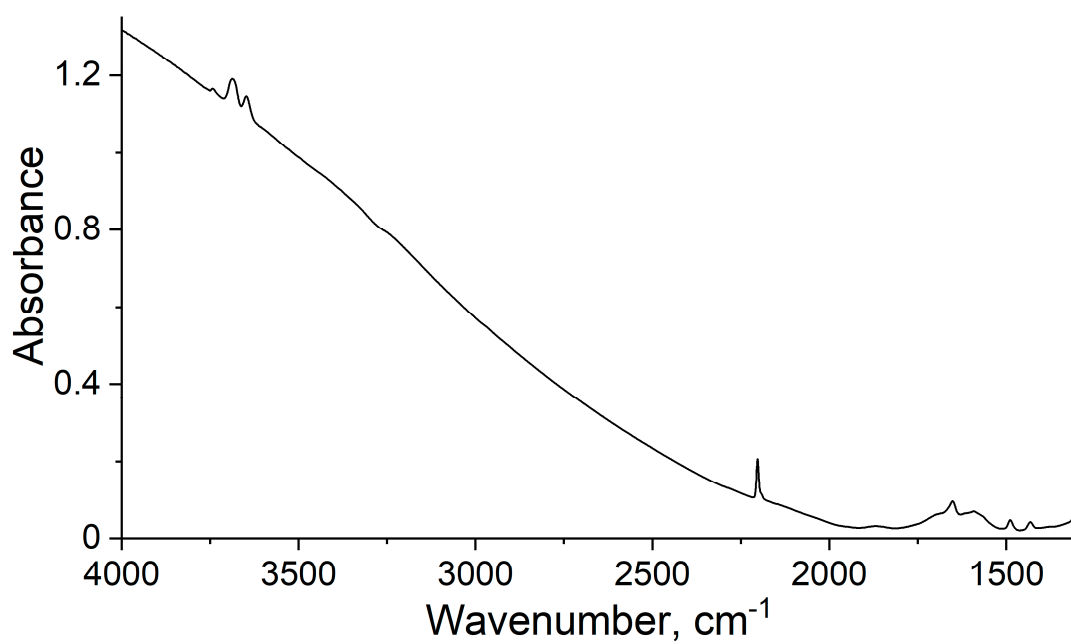

Figure S43 FTIR spectrum of NaX

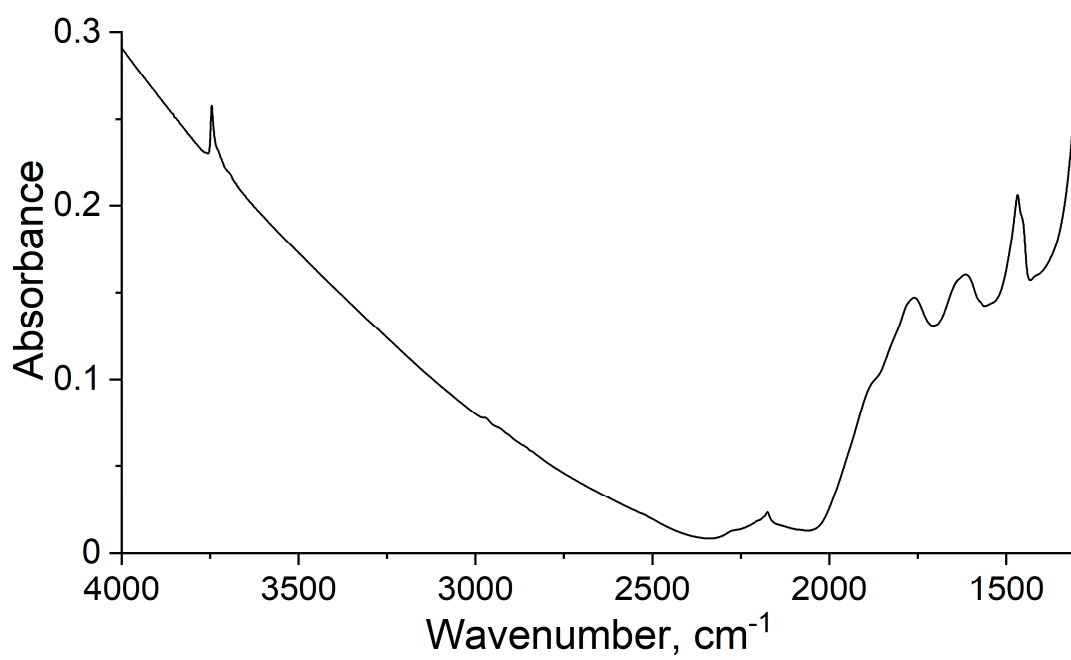

Figure S44 FTIR spectrum of NaY

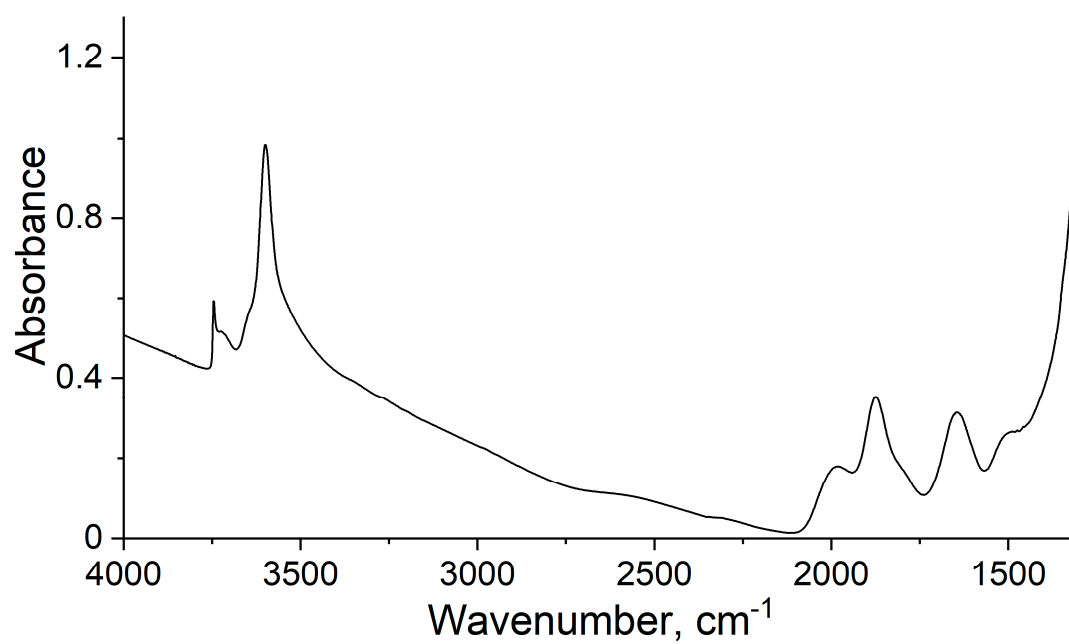

Figure S45 FTIR spectrum of FER

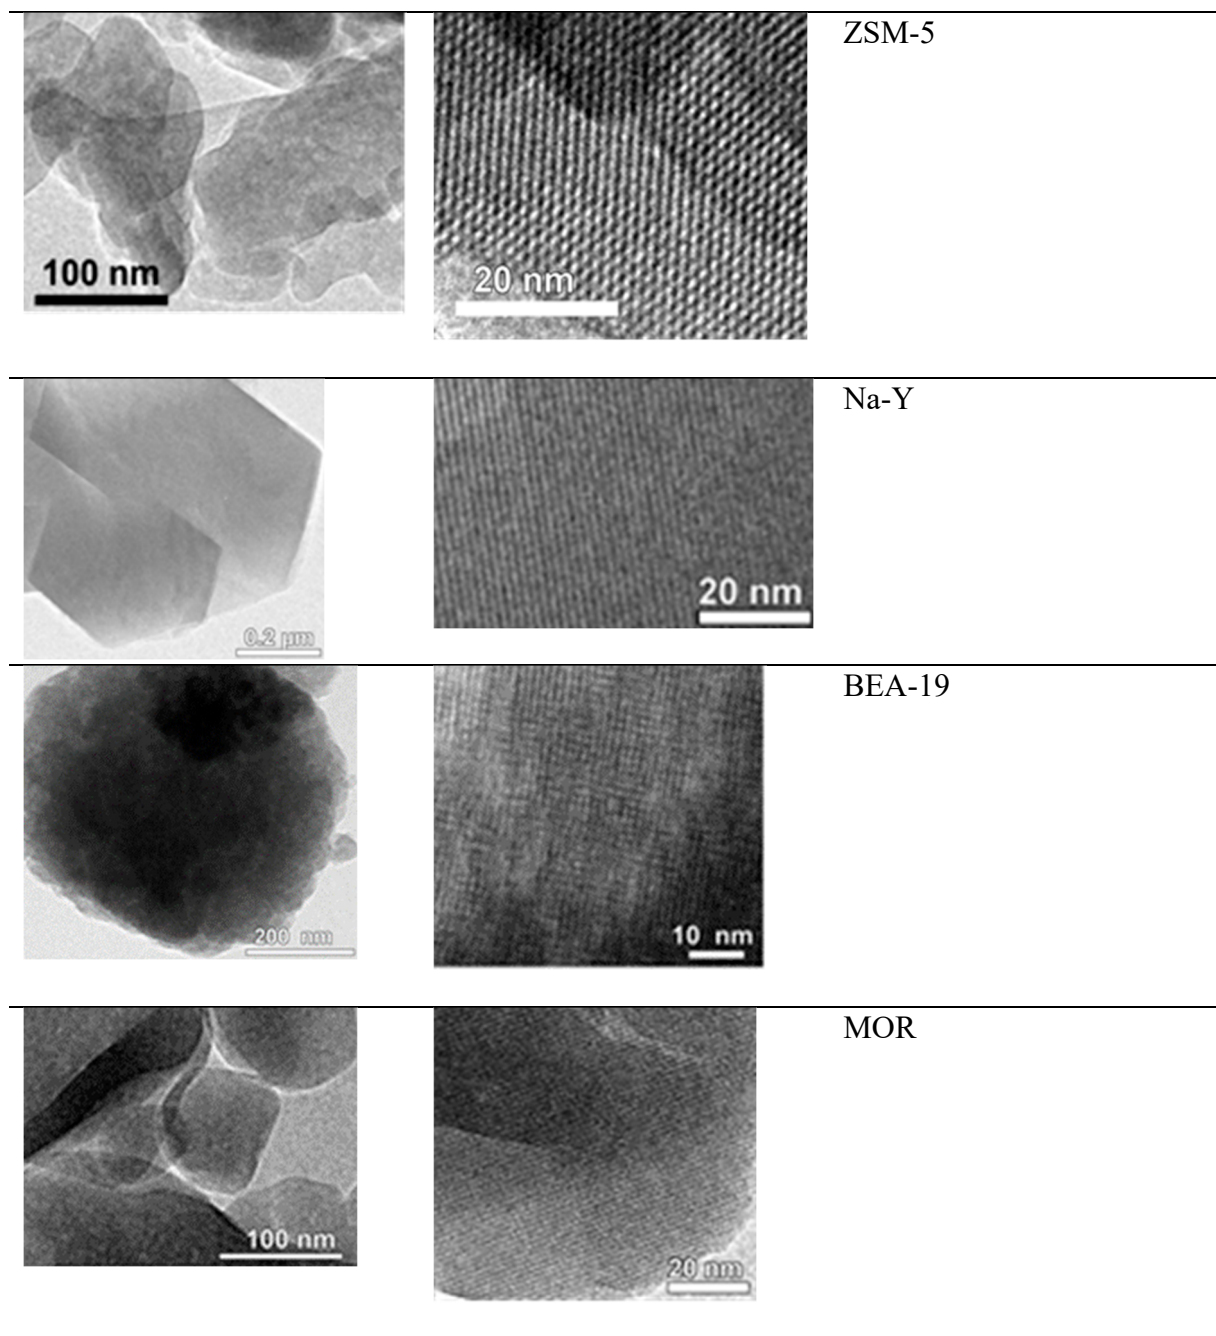

Figure S46 Electron microscopy data for selected zeolites.
